1  
2  
3  
4  
5  
6  
7  
8  
9  
10  
11  
12  
13  
14  
15  
16  
17  
18  
19  
20  
21  
22  
23  
24  
25  
26  
27  
28  
29  
30  
31  
32  
33  
34  
35  
36  
37  
38  
39  
40  
41  
42  
43  
44

## Radixin modulates stereocilia function and contributes to cochlear amplification

Sonal Prasad<sup>1\*</sup>, Barbara Vona<sup>2</sup>, Marta Diñeiro<sup>3</sup>, María Costales<sup>4</sup>, Rocío González-Aguado<sup>5</sup>, Ana Fontalba<sup>6</sup>, Clara Diego-Pérez<sup>7</sup>, Asli Subasioglu<sup>8</sup>, Guney Bademci<sup>9</sup>, Mustafa Tekin<sup>9, 10, 11</sup>, Rubén Cabanillas<sup>12</sup>, Juan Cadiñanos<sup>3</sup>, Anders Fridberger<sup>1\*, ‡</sup>

<sup>1</sup>Department of Biomedicine and Clinical Sciences, Linköping University, SE-581 83 Linköping, Sweden

<sup>2</sup>Department of Otorhinolaryngology, Head and Neck Surgery, Tübingen Hearing Research Centre, Eberhard Karls University Tübingen, 72076 Tübingen, Germany

<sup>3</sup>Laboratorio de Medicina Molecular, Instituto de Medicina Oncologica y Molecular de Asturias, 33193 Oviedo, Spain

<sup>4</sup>Department of Otorhinolaryngology, Hospital Universitario Central de Asturias, 33011 Oviedo, Spain

<sup>5</sup>Department of Otorhinolaryngology, Hospital Universitario Marqués de Valdecilla, 39008 Santander, Spain

<sup>6</sup>Department of Genetics, Hospital Universitario Marqués de Valdecilla, 39008 Santander, Spain

<sup>7</sup>Department of Otorhinolaryngology, Hospital Universitario de Salamanca, 33007 Salamanca, Spain

<sup>8</sup>Department of Medical Genetics, Izmir Ataturk Education and Research Hospital, Izmir 35360, Turkey

<sup>9</sup>John P. Hussman Institute for Human Genomics, University of Miami Miller School of Medicine, Miami, FL 33136, USA

<sup>10</sup>Department of Otolaryngology, University of Miami Miller School of Medicine, Miami, FL 33136, USA

<sup>11</sup>Dr. John T. Macdonald Department of Human Genetics, University of Miami Miller School of Medicine, Miami, FL 33136, USA

<sup>12</sup>Área de Medicina de Precisión, Instituto de Medicina Oncologica y Molecular de Asturias, 33193 Oviedo, Spain

\*Correspondence and requests for materials should be addressed to S.P. (sonal.prasad@liu.se) and A.F. (anders.fridberger@liu.se)

‡Lead contact: A.F. (anders.fridberger@liu.se)

Keywords: Inner ear, outer hair cell, stereocilia stiffness, radixin, physiology, bundle mechanics, electrical potentials, mechanical stability, amplification, hearing loss

**Short title:** Distinct mechanisms of hearing loss in patients with *RDX* mutations

**Conflict of interest:** The authors have declared that no conflict of interest exists.

45 **Abstract**

46 The stereocilia of the sensory cells in the inner ear contain high levels of the actin-binding  
47 protein radixin, encoded by the *RDX* gene. Radixin which is associated with  
48 mechanotransduction process such as  $PIP_2$  is known to be important for hearing but its  
49 functional role remains obscure. To determine how radixin influences hearing sensitivity, we  
50 used a custom rapid imaging technique to directly visualize stereocilia motion while  
51 measuring the amplitude of the electrical potentials produced by sensory cells during  
52 acoustic stimulation. Experiments were performed in guinea pigs, where upon blocking  
53 radixin, a large decrease in sound-evoked electrical potentials occurred. Despite this  
54 decrease other important functional measures, such as electrically induced sensory cell  
55 motility and the sound-evoked deflections of stereocilia, showed a minor amplitude  
56 increase. This unique set of functional properties alterations demonstrate that radixin is  
57 necessary to ensure that the inner ear converts sound into electrical signals at acoustic rates.  
58 Radixin is therefore a necessary and important component of the cochlear amplifier, the  
59 energy-consuming process that boosts hearing sensitivity by up to 60 dB.

60

61 **Introduction**

62 The sensory cells of the inner ear are equipped with stereocilia, which harbor a molecular  
63 machinery that permits sound to be converted into electrical potentials. The protein radixin  
64 appears to be an important component of this machinery, since radixin-deficient mice are  
65 deaf<sup>1</sup> from an early age and mutations in the human *RDX* gene is a cause of non-syndromic  
66 neurosensory hearing loss (DFNB24; MIM #611022, ref. <sup>2,3</sup>). Because of the effect of  
67 mutations, it is clear that radixin is necessary for normal hearing, but the physiological role  
68 of the protein remains obscure.

69

70 Radixin is enriched within stereocilia<sup>4</sup> and bioinformatic analyses suggest that it is a hub in a  
71 network of interacting molecules<sup>5</sup> associated with the mechanotransduction process, such  
72 as phosphatidylinositol-4,5-bisphosphate (PIP2, ref. <sup>6</sup>). While the functional relevance of  
73 these interactions has not been clarified, it is evident that phosphorylated radixin links the  
74 actin cytoskeleton with various transmembrane adhesion proteins, such as CD44<sup>7,8</sup>.

75

76 Given radixin's central role in the network of proteins within stereocilia, we hypothesized  
77 that radixin may contribute to the regulation of cochlear amplification. The cochlear  
78 amplifier uses force generated within the soma of outer hair cells<sup>9</sup> or within their  
79 stereocilia<sup>10,11</sup> to establish normal hearing sensitivity and frequency selectivity. The  
80 underlying mechanisms are however controversial and evidence for active force generation  
81 by mammalian stereocilia remain contentious<sup>12</sup>, in part because the effects of stereocilia  
82 force production are difficult to experimentally separate from the effects of the somatic  
83 motor.

84

85 To determine the influence of radixin on cochlear amplification and sensory cell function, we  
86 used a custom rapid confocal imaging technique to examine stereocilia motion while  
87 recording the electrical potentials produced by the sensory cells during acoustic stimulation.  
88 These measurements revealed an unusual pattern of functional changes when radixin was  
89 disabled. The sound-evoked electrical potentials were substantially reduced despite other  
90 important functional measures, such as stereocilia deflections and electrically induced  
91 motility, being intact. This shows that radixin allows mechanically sensitive ion channels to  
92 work at acoustic rates, suggesting radixin is a component of the cochlear amplifier acting at  
93 the level of stereocilia.

94

95 We also provide a clinical characterization of patients with *RDX* variants. Their hearing was  
96 normal early in life, presumably because ezrin partially substitutes for radixin, but hearing  
97 was lost during the first months of life. This causes a delay in diagnosis but also means that a  
98 brief therapeutic window exists in the event that specific therapies aimed at DFNB24  
99 become available.

100

101 **Results**

102 *Clinical findings in patients with mutations in the RDX gene*

103 The first patient was a 2-year old female of Moroccan origin born to term after a normal  
104 pregnancy and delivery. Maternal serology was positive for rubella and negative for hepatitis  
105 B, human immunodeficiency virus, *Toxoplasma gondii*, and syphilis, ruling out these agents as  
106 contributors to congenital hearing loss. There was no risk for chromosomal abnormalities or  
107 metabolopathies, as revealed by standard screening. The only risk factor was consanguinity,  
108 as her parents were cousins. Importantly, hearing screening before the third day of life  
109 revealed that otoacoustic emissions, faint sounds produced by the inner ear in response to  
110 low-level acoustic clicks, were present. Since the sensory outer hair cells must be intact for  
111 otoacoustic emissions to be generated, this ruled out clinically significant peripheral hearing  
112 loss (see *e.g.* ref. <sup>13</sup>).

113

114 However, at the age of 16 months the patient was referred to the ENT department because  
115 of suspected hearing loss. At this time, otoacoustic emissions could not be detected,  
116 suggesting that peripheral hearing loss had developed. Auditory evoked potentials were  
117 absent and steady state evoked potential testing revealed a bilateral threshold of 90 dB  
118 hearing level at 0.5 and 1 kHz (a pedigree and the patient's evoked potential audiogram are  
119 shown in Figure 1A). These findings are diagnostic of profound hearing loss.

120

121 Genotyping with the OTOgenics panel<sup>14</sup> revealed a homozygous mutation in the *RDX* gene  
122 (NM\_002906.3: c.129G>A, p.W43X), which was confirmed with Sanger sequencing. The  
123 mutation truncated the protein in exon 3 (of 14), leaving only a part of the membrane-  
124 binding domain but stripping all of the actin-binding C-terminus, a change that completely  
125 disables radixin since most of its length is lost.

126

127 The second patient was female and adopted at 6 months of age. Early hearing screening was  
128 performed with brainstem auditory evoked potentials and the patient passed. However, she  
129 was referred to the ENT department at 8 months of age with a suspicion of hearing loss.

130 Testing with steady-state evoked potentials showed moderate hearing loss (Figure 1B).

131 Genotyping indicated a homozygous deletion of all of *RDX*'s second exon, where the  
132 initiation codon is located (NM\_002906.3: c.-64-1215\_12+348). Notably, an in-frame start  
133 codon present in exon 3 may mean that a protein 11 amino acids shorter is present in this  
134 patient. This shortened protein should be capable of attachment to the actin cytoskeleton,  
135 but the mutation will interfere with membrane binding.

136

137 Our third case was diagnosed with hearing loss in infancy and underwent pure tone  
138 audiometry at the age of 8 years, revealing a bilaterally symmetrical profound sensorineural  
139 hearing loss (Figure 1C). Exome sequencing disclosed a homozygous nonsense variant in  
140 exon 11 of *RDX* (NM\_002906.3: c.1108C>T, p.R370X). This removes the highly conserved  
141 actin-binding motif (exons 13 and 14, ref. <sup>2</sup>), preventing radixin from interacting with actin

142 filaments. Otoacoustic emissions were absent, and a younger sister was similarly affected  
143 with symmetrical profound sensorineural hearing loss without otoacoustic emissions. Both  
144 siblings had the same homozygous *RDX* variant. Neonatal hearing screening was not  
145 performed in either case.

146

147 Overall, these clinical data show that patients with *RDX* mutations can have normal hearing  
148 on the first days of life, but hearing sensitivity deteriorates thereafter. It is not clear why this  
149 hearing loss develops, so we performed additional experiments to determine the functional  
150 role of radixin.

151

### 152 *Radixin expression in the hearing organ*

153 To study radixin's influence on hearing and the role of the protein for stereocilia function  
154 (Figure 2A), we used temporal bone preparations isolated from guinea pigs (Figure 2B), a  
155 species with low-frequency hearing similar to humans. In these isolated preparations, which  
156 retain the passive mechanics of the hearing organ<sup>15</sup>, direct visualization of sound-evoked  
157 stereocilia motion is possible in a nearly native environment (Figure 2C and D, ref. <sup>16</sup>), which  
158 makes the preparation useful for investigating functional changes in stereocilia. However,  
159 the presence and distribution of radixin has not previously been examined in guinea pig hair  
160 cells, so we began by staining the mature organ of Corti with phosphospecific antibodies  
161 targeting radixin's threonine 564 residue.

162

163 Immunofluorescence was observed in the stereocilia of the sensory outer and inner hair  
164 cells, with the strongest labeling in the three rows of outer hair cells. Double-labeling with  
165 fluorescently tagged phalloidin, which binds actin filaments (Figure 2E, left column), was  
166 used to locate stereocilia. These were intensely labeled by radixin antibodies (Figure 2E,  
167 center and right columns), whereas no consistent radixin label was present in either the cell  
168 bodies of the sensory cells, in their adjacent supporting cells, or in the synaptic regions of  
169 the inner hair cells (Figure 2F).

170

171 Three-dimensional reconstructions of stereocilia (Figure 2G) showed that radixin labeling  
172 was most intense in the mid-basal part of stereocilia and tapered off toward their tip. To  
173 quantify this more precisely, we measured the fluorescence intensity of each probe as a  
174 function of distance from the base of the hair bundle. Plots of the normalized fluorescence  
175 profiles (Figure 2H) confirmed the stronger labeling near the base of stereocilia, unlike the  
176 actin probe (phalloidin), which had similar labeling intensity through the length of the  
177 stereocilia.

178

179 Since the actin probe had stronger emission, we were concerned that its fluorescence might  
180 bleed through into the radixin channel. If this were the case, a linear relationship between  
181 their fluorescence intensities is expected. However, no such relationship was found (Figure  
182 2I). This pattern of labeling is consistent with the one found in chick<sup>17</sup> and rat<sup>18</sup> inner ears, so

183 we conclude that guinea pigs are an adequate model for investigating the functional role of  
184 radixin in the mature hearing organ. Next, we performed physiological measurements by  
185 combining rapid confocal imaging of sound-evoked stereocilia motion with  
186 electrophysiology, measurements of electrically evoked motion, fluorescence recovery after  
187 photobleaching, and *in vivo* measurements of hearing sensitivity in animals treated with  
188 radixin inhibitors.

### 189 190 *Radixin influences stereocilia deflections*

191 Having established that radixin is present in guinea pig hair cells, but not detectable in  
192 supporting cells or in afferent neurons, we proceeded by examining the sound-evoked  
193 responses of stereocilia. To label stereocilia, a double-barreled glass microelectrode with 3-  
194  $\mu\text{m}$  tip diameter was positioned close to the sensory cells. One electrode barrel was used for  
195 introducing the fluorescent dye di-3-ANEPPDHQ, which stained stereocilia (Figure 2C) and  
196 allowed their sound-evoked motion to be studied using time-resolved confocal imaging<sup>19, 20</sup>.  
197 The other electrode barrel was used for delivering the radixin blocker DX-52-1, which  
198 disrupts radixin's ability to link the actin cytoskeleton with the cell membrane (ref.<sup>21, 22</sup>;  
199 Figure 3A). The loss of these interactions creates an effect similar to the truncating  
200 mutations described in our patients.

201  
202 After injecting a 1-mM solution of DX-52-1 dissolved in artificial endolymph, no  
203 morphological changes were observed in stereocilia (except for minor alterations in the  
204 brightness of the dye, Figure 3B; note that the effective inhibitor concentration is reduced  
205 because the injected solution is dissolved in the endolymph present in scala media), but the  
206 injection changed the response to acoustic stimulation. Before DX-52-1 (Figure 3C, left  
207 graph), the base of the hair bundle (blue trajectory) had a different direction of motion than  
208 the bundle tip (red trajectory). As a result of this difference, motion directed at scala  
209 tympani (downwards in Figure 3C) caused deflection of stereocilia toward the center of the  
210 cochlear spiral (green trajectory). Ten to fifteen minutes after DX-52-1 (Figure 3C, right  
211 graph), sound-evoked displacement showed a minor but significant increase both at the  
212 base and at the tip of the hair bundle. As a consequence, the sound-evoked deflection of the  
213 hair bundle became larger (green trajectory in the right graph in Figure 3C). In preparations  
214 treated with vehicle alone (endolymph with 1.8% DMSO), neither morphology nor motion  
215 trajectories changed (Figure 3E and F).

216  
217 The change induced by DX-52-1 was apparent 10 minutes after its application and  
218 deflections remained elevated for at least 10 minutes thereafter (Figure 3D, n=70). This  
219 period of elevated sound-induced motion was followed by gradual recovery. Figure 3G-I  
220 shows the hair bundle motion change across 70 preparations. At both the tip and the base of  
221 the hair bundle, the motion amplitude increased (from  $98 \pm 15$  nm to  $116 \pm 48$  nm at the  
222 base;  $p < 0.0001$ , two-tailed paired t test, Figure 3G; and from  $90 \pm 24$  nm to  $102 \pm 40$  nm at  
223 the tip;  $p = 0.04$ , Figure 3H). Base motions were larger than the tip motion, as previously

224 described<sup>8</sup>. The change in the deflection amplitude was also significant (from  $48 \pm 21$  nm to  
225  $56 \pm 28$  nm;  $p < 0.0001$ , two-tailed paired t test; Figure 3I). A significant difference was also  
226 found when preparations injected with DX-52-1 were compared to those injected with  
227 vehicle alone (Figure 3G and h;  $n = 27$ ; two-tailed unpaired t test with Welch's correction).

228

229 In summary, the data shown in Figure 3B-I demonstrate that the radixin blocker DX-52-1  
230 affected the sound-evoked motion of stereocilia, causing mildly increased deflection  
231 amplitudes. This finding clearly cannot explain the hearing loss seen in patients, but it is  
232 consistent with an effect of radixin on the stiffness of stereocilia.

233

#### 234 *Radixin affects electrically evoked motility*

235 Outer hair cells contain a transmembrane protein, prestin, which confers upon the cell the  
236 ability to rapidly change length in response to alterations in membrane potential<sup>9</sup>. This  
237 electromotility is critical for hearing, and to further probe radixin's influence on hair cell  
238 function, we measured electrically evoked motility using the rapid imaging technique  
239 described above. The double-barreled microelectrode allowed us to apply 10- $\mu$ A square  
240 wave currents at the frequency of 5 Hz. These currents changed the electrical potential in  
241 scala media, resulting in increased currents through the MET channels and increased force  
242 production by outer hair cells<sup>23</sup>.

243

244 To show the change in electromotility evoked by DX-52-1, Figure 3J shows an outer hair cell  
245 imaged *in situ* during electrical stimulation. The green channel was acquired during the  
246 negative part of the square wave and the red channel during its positive phase. Before DX-  
247 52-1 application, most pixels overlapped, signifying low motility amplitude (Figure 3J, top  
248 right graph). After DX-52-1 was introduced, the green and the red channels separated,  
249 implying an increased amplitude of electromotility (Figure 3J, bottom right graph). These  
250 changes were quantified through optical flow analysis. The time course (Figure 3K) shows  
251 that the increase was evident 10 minutes after injection of the blocker and that the  
252 amplitude remained elevated during 20 – 25 minutes. A tendency to recovery was seen  
253 thereafter. Overall, the change induced by DX-52-1 was statistically significant (from  $101 \pm 2$   
254 nm to  $139 \pm 12$  nm;  $p = 0.001$ , two-tailed paired t test;  $n = 70$ ), but this was not the case in  
255 preparations injected with the vehicle alone (Figure 3L), where no change in motion  
256 occurred.

257

258 Electrically evoked motility requires current passing through stereocilia and into the cell  
259 bodies of the outer hair cells, as evidenced by decreased amplitudes of electromotility when  
260 mechanically sensitive ion channels were blocked. Since we found an increased amplitude of  
261 electrically evoked motion, these channels must still be able to pass current.

262

263 The increase in electromotility is consistent with a slightly decreased organ of Corti stiffness,  
264 in agreement with the changes in sound-evoked stereocilia motion described above.  
265 However, neither finding explains why hearing is lost in patients with *RDX* mutations.

266

#### 267 *The site of action of DX-52-1 is the stereocilia*

268 To verify that DX-52-1 acts at the level of the stereocilia, we exploited the fact that radixin  
269 connects the cell membrane with the underlying actin cytoskeleton. Hence, inhibition of  
270 radixin is expected to remove an obstacle to diffusion, increasing the mobility of membrane  
271 lipids. Lipid mobility can be measured using fluorescence recovery after photobleaching  
272 (FRAP)<sup>24</sup>. In brief, a laser beam was focused to a submicron spot to bleach a region of  
273 interest on the stereocilia (Figure 3M). Since diffusion will add new dye molecules to the  
274 bleached area, the gradual recovery of fluorescence provides a measure of lipid mobility in  
275 the membrane, as seen in the graph in Figure 3N. Here, a single-phase exponential model  
276 (black line) was fitted to the averaged fluorescence recovery curve measured before (red  
277 open circles) and 10 - 15 minutes after DX-52-1 injection (blue circles). The fit parameters  
278 revealed significantly faster fluorescence recovery during the 25-30 minutes that followed  
279 inhibition of radixin (Figure 3O;  $22 \pm 2$  s vs.  $14 \pm 1$  s;  $p=0.02$ , two-tailed paired t test;  $n= 24$ ).  
280 Control injections in 14 preparations showed no significant change in the fluorescence  
281 recovery time (Figure 3N). The normalized diffusion time was slightly longer after vehicle  
282 injection (Figure 3O), but this change was not significant.

283

284 The changes in lipid mobility are consistent with disruption of membrane – cytoskeletal  
285 interactions when radixin is blocked.

286

#### 287 *Radixin inhibition decreased cochlear microphonic potentials*

288 During sound stimulation, ions permeate mechanically sensitive ion channels from the  
289 surrounding fluid, generating extracellular electrical potentials that can be measured  
290 through the electrode placed near the sensory cells. By tracking the amplitude of these  
291 microphonic potentials over a range of stimulus frequencies, tuning curves were acquired.

292

293 Upon injection of DX-52-1, a decrease in the cochlear microphonic (CM) amplitude (Figure  
294 3P) was evident 10-15 minutes after the blocker injection, and the amplitude remained  
295 depressed during the ensuing 30 – 35 minutes (Figure 3Q,  $n=70$ ). On average, the CM  
296 amplitude decreased from  $124 \pm 16$   $\mu$ V to  $57 \pm 9$   $\mu$ V, measured at the peak of each tuning  
297 curve (Figure 3R,  $p<0.0001$ , two-tailed paired t test). A significant difference in the amplitude  
298 was also evident between preparations injected with DX-52-1 and the controls ( $p<0.0001$ ,  
299 two-tailed unpaired t test with Welch's correction;  $n= 13$  controls).

300

301 The decrease in the CM amplitude means that the ability to convert sound into rapidly  
302 alternating electrical potentials is impaired. This however is not due to a change in the  
303 stimulation of stereocilia, because stereocilia deflections were slightly increased (Fig. 3B-I).



304 Also, the decrease in the CM is not due to a blocking effect on mechanically sensitive  
305 channels, as demonstrated by the increase in electrically evoked motion (Fig. 3J-L), which  
306 requires currents to pass through these channels into the hair cell soma.

307

308 *Compound action potentials indicate loss of hearing sensitivity in vivo*

309 To assess the influence of radixin on hearing sensitivity *in vivo*, we applied 1  $\mu$ l of a 1 mM  
310 DX-52-1 solution directly to the round window membrane of anesthetized guinea pigs while  
311 measuring the amplitude of the auditory nerve compound action potential (CAP). The CAP  
312 represents the summed response of auditory nerve fibers to acoustic stimulation, and is  
313 most effectively elicited by high-frequency acoustic stimuli with rapid rise time. Ten to 40  
314 minutes after the application of DX-52-1, the CAP amplitude decreased significantly  
315 compared to control preparations where only the vehicle, perilymph with 1.8% DMSO, was  
316 applied (Figure 4A).

317

318 Analysis of CAPs confirmed that hearing impairment was most pronounced at frequencies  
319 between 8 and 16 kHz, while smaller changes were observed at other frequencies (Figure  
320 4B; n=18 for DX-52-1 vs 10 controls; p<0.0001; two-way ANOVA ). While the overall shape of  
321 the CAP waveform remained similar after DX-52-1, there was a slight increase in the  
322 response latency (Figure 4C, E). Figure 4D demonstrates the time course for the change in  
323 CAP N1 peak amplitude, with maximum amplitude change after about 20 - 30 min. As shown  
324 in Figure 4F, DX-52-1 decreased the amplitude of the cochlear microphonic potential (in  
325 Figure 4F, the stimulus was a 90-dB SPL tone at 8 kHz).

326

327 The above data show that inhibition of radixin has effects that parallell the human data,  
328 where *RDX* mutations caused profound hearing loss.

329

330 *PAO-induced effects on stereocilia function*

331 Radixin mediates interactions between the cytoskeleton and the cell's membrane, but  
332 membrane attachment also requires the presence of PIP2, the synthesis of which can be  
333 blocked by kinase inhibitors such as phenylarsineoxide (PAO; Figure 5A and ref. <sup>6</sup>). Although  
334 the rates of both fast and slow adaptation are affected by PAO<sup>6</sup>, its indirect inhibitory effect  
335 on radixin can be used to confirm some of the DX-52-1 effects described above.

336

337 Injection of a 1-mM PAO solution into the endolymphatic space produced minor changes in  
338 brightness of outer hair cell stereocilia, but no other morphological changes were evident  
339 (Figure 5B). As seen in the example data in Figure 5C, the sound-evoked displacement at  
340 both the tip of the stereocilia (red trajectory) and at their base (blue trajectory) decreased  
341 following PAO. This decrease led to a reduced deflection amplitude (green trajectory; right  
342 panel in Figure 5C), even though the shapes of the motion trajectories remained similar. The  
343 change in deflection amplitude was apparent 10 – 15 minutes after PAO injection and the  
344 amplitude continued to be reduced over the ensuing 40 minutes (Figure 5D, n=35).

345 Aggregated data across 35 preparations are shown in Figure 5E - F. The decrease in motion  
346 amplitude at the base of stereocilia was significant (from  $97 \pm 6$  nm to  $86 \pm 22$  nm;  $p < 0.0001$ ,  
347 two-tailed paired t test; Figure 5E) as were the change in displacement at their tips (from  $80$   
348  $\pm 19$  nm to  $72 \pm 22$  nm;  $p < 0.004$ , 2-tailed paired t test; Figure 5f). The deflection amplitude  
349 decreased from  $46 \pm 21$  nm to  $37 \pm 20$  nm ( $p < 0.0001$ , two-tailed paired t test; Figure 5G). A  
350 significant difference was also found when preparations injected with PAO were compared  
351 to those injected with vehicle alone (Figure 5G;  $p = 0.004$ , two-tailed unpaired t test with  
352 Welch's correction).

353  
354 Considering that DX-52-1 caused an increased motion amplitude in response to electrical  
355 stimulation, we proceeded by examining the influence of PAO on electromotility. Color-  
356 coded data from an example preparation are shown in Figure 5H. In this case, images  
357 acquired before and after PAO largely overlapped as demonstrated by the yellow color in  
358 Figure 5H, indicating that PAO did not change electrically evoked organ of Corti motion.  
359 Across 28 preparations, there was an increase from  $93 \pm 6$  nm to  $125 \pm 24$  nm in the mean  
360 amplitude of electrically evoked motion, but this change was not significant ( $p = 0.20$ , two-  
361 tailed paired t test; Figure 5I). Also, there was no significant difference between preparations  
362 injected with the vehicle alone and those injected with PAO (Figure 5I).

363  
364 Next, we used FRAP to look for changes in the membrane lipid diffusion kinetics after PAO  
365 injection. Diffusion of di-3-ANEPPDHQ molecules within a defined ROI (Figure 5J) on the  
366 stereocilia was measured. In the data shown in Figure 5K, a single-phase exponential model  
367 (black line) was fitted to the averaged fluorescence recovery curve before (red open circle)  
368 and 10 minutes after PAO injection (blue filled circles). The fit parameters revealed  
369 significantly faster (from  $21 \pm 3$  s to  $16 \pm 2$  s;  $p = 0.04$ , two-tailed paired t test;  $n = 22$ ; Figure 5L)  
370 diffusion during the ensuing 25 -30 minutes. A significant difference in the fluorescence  
371 recovery time was also seen between preparations injected with PAO and the controls  
372 (Figure 5L;  $p = 0.03$ , two-tailed unpaired t test with Welch's correction).

373  
374 PAO injection also led to a decrease in the CM amplitude (Figure 5M). The drop in the CM  
375 amplitude was evident within 10-15 minutes after the injection, and there was no recovery  
376 during the ensuing 30 – 40 minutes (Figure 5N;  $n = 33$ ). On average, the CM amplitude  
377 decreased from  $145 \pm 20$   $\mu$ V to  $58 \pm 10$   $\mu$ V, measured at the peak of each tuning curve  
378 (Figure 5O,  $p < 0.0001$ , two-tailed paired t test). A significant difference in the amplitude was  
379 seen between preparations injected with PAO and the controls (Figure 5O;  $p < 0.0001$ , two-  
380 tailed unpaired t test with Welch's correction).

381  
382 The change in lipid mobility evoked by PAO and the decrease in the CM amplitude are  
383 consistent with the DX-52-1 findings; however PAO is unspecific (25) and will affect many  
384 proteins found in stereocilia, which likely explains why the effects on sound-evoked motion  
385 and on electromotility differ from those of DX-52-1.

## 386 Discussion

387 This study shows that radixin allows stereocilia to generate electrical potentials at acoustic  
388 rates, making radixin necessary for cochlear amplification. The effects of radixin inhibition  
389 are not due to a change in the stimulation of the sensory cells, since stereocilia deflections  
390 showed a minor increase upon blocking radixin (Fig. 3). Similarly, the decrease in the  
391 electrical potentials produced by the sensory cells is not due to inhibition of electromotility.  
392 The increase in both sound-evoked deflections and in electromotility are however consistent  
393 with a decrease in stereocilia stiffness.

394

395 Previous studies showed that hair cell stereocilia contain high levels of radixin<sup>1,4,5</sup>. Some  
396 studies also demonstrated radixin labeling at the junctions between the supporting cells and  
397 the hair cells<sup>26</sup>, but this was not evident in our experiments and no consistent labeling was  
398 found in either neurons or in the cell bodies of the sensory cells. These results suggest that  
399 radixin inhibition affects stereocilia function. This view is supported by findings from radixin  
400 knockout mice, which show degeneration of stereocilia after the onset of hearing, but an  
401 otherwise normal organ of Corti structure<sup>1</sup>. It appears that upregulation of ezrin, a protein  
402 closely related to radixin, ensures normal early development of stereocilia but this  
403 compensation mechanism subsequently fails. Hence, it is clear that radixin is critical during  
404 the final phases of stereocilia development, but it continues to be expressed at high levels  
405 through the life of the animal<sup>1</sup> suggesting an important physiological role that has remained  
406 obscure.

407

408 Membrane-associated proteins such as radixin are often regulated by membrane lipids.  
409 Radixin is activated only after positive regulation, which requires sequential binding of PIP2  
410 and phosphorylation of threonine 564<sup>27</sup>. In hair cells, radixin is concentrated towards the  
411 stereocilia base, where they insert into the cuticular plate. This taper region is a site of  
412 mechanical stress during sound-evoked deflection<sup>28</sup>. Based on the findings of the present  
413 study we propose that radixin, in addition to its role for channel function, contributes to the  
414 regulation of stereocilia stiffness by linking the cytoskeleton more tightly to the membrane  
415 inside this high-stress region. Findings evident after the inhibition of radixin and consistent  
416 with this hypothesis include the increased lipid mobility (Figure 3N, O), larger electrically  
417 evoked motility (Figure 3K, L), and larger sound-evoked stereocilia deflections (Figure 3C, G-  
418 I) evident after inhibition of radixin. Due to the active, nonlinear mechanisms that amplify  
419 sound-evoked motion *in vivo*<sup>29, 30</sup>, small changes in the mechanical properties of stereocilia  
420 can have large effects on hearing organ performance.

421

422 However, the most dramatic effect of radixin inhibition was the reduction in sound-evoked  
423 electrical potentials and in the amplitude of the CAP. This demonstrate a previously  
424 unrecognized role of radixin in maintaining the amplitude of the mechano-electrical  
425 transduction current. Since we (Figure 2) could detect no radixin expression either in  
426 cochlear neurons or at the synaptic pole of the hair cells, the reduction of the CAP amplitude

427 is explained by an effect on the transduction process itself. This finding is supported by the  
428 normal morphology of the organ of Corti in aged radixin knockout mice<sup>1</sup>, and with the  
429 absence of detectable radixin expression in cochlear neurons<sup>2</sup>.

430

431 It is interesting that two of our patients had apparently normal hearing at birth, as shown  
432 by them passing the newborn hearing screening program (the 2 siblings from pedigree 3 did  
433 not undergo neonatal hearing screening). The subsequent development of hearing loss could  
434 be due to a combination of reduced transduction currents and an inability to maintain  
435 stereocilia structure, including their stiffness, in the long term in the absence of membrane-  
436 cytoskeletal links. However, hearing loss was profound in three of our patients and  
437 moderate in one. At first sight, the removal of the start codon in exon 2 in this patient should  
438 lead to complete absence of radixin expression. Due to an in-frame start codon present in  
439 exon 3, it is however possible that a protein 11 amino acids shorter could be produced. We  
440 speculate that such a shorter protein could retain some functionality, explaining the less  
441 severe hearing loss in this patient and suggesting a clinically relevant genotype-phenotype  
442 correlation for pathogenic *RDX* variants. Moreover, in one of our families copy number  
443 variations contributed to the development of the hearing loss. It is important to identify such  
444 variation during genetic testing, since it is a challenge to conventional next-generation  
445 sequencing technologies.

446

447 The development of early onset hearing loss in children that passed newborn hearing  
448 screening can confound both patients and their physicians causing diagnosis and  
449 intervention to be postponed<sup>31, 32, 33</sup>. The resulting delays in speech and language  
450 development may contribute to impairment of social skills and cognition<sup>34</sup>. No previous  
451 study has examined the effect of radixin on stereocilia function. Therefore, understanding  
452 the physiopathology of genes such as *RDX* and increasing our awareness of its contribution  
453 to this burden of delayed diagnosis could improve the care of children with hearing  
454 impairment. This is important, specially for siblings of already diagnosed patients. Therefore,  
455 in these families, if a genetic diagnosis has not been obtained, close monitoring of the  
456 siblings that have passed initial newborn hearing screening is mandatory. Importantly, the  
457 fact that hearing appeared normal early in life could mean that a time window exists in the  
458 event that therapies for restoring radixin functionality become available. In any case, those  
459 potential, gene-specific, therapeutic opportunities will always be enhanced by an early and  
460 comprehensive genetic diagnosis.

461

## 462 **Materials and Methods**

### 463 *Ethics statement*

464 The clinical data collection was approved by the Institutional Review board at the University  
465 of Miami (USA) and by the by the Comité de Ética de Investigación del Principado de Asturias  
466 (research project #75/14), Spain. A signed informed-consent form was obtained from each  
467 participant or, in the case of a minor, from the parents. The Regional Ethics Board in  
468 Linköping approved all animal experiments (DNR 16-14) and animal care was under the  
469 supervision of the Unit for Laboratory Animal Science at Linköping University.

470

### 471 *Clinical study*

472 Patients I and II (Figure 1) were evaluated according to standard newborn hearing screening  
473 protocols using otoacoustic emissions and/or auditory evoked potentials. Later, patients I and  
474 II were studied again because of a suspicion of hearing loss. Objective measures of hearing  
475 was used to establish their audiograms. In patient III, sensorineural hearing loss was  
476 diagnosed via standard audiometry in a soundproof room according to current clinical  
477 standards as recommended by the International Standards Organization (ISO8253-1).  
478 Routine pure-tone audiometry was performed with age-appropriate methods to determine  
479 hearing thresholds at frequencies 0.25, 0.5, 1, 2, 4, 6 and 8 kHz. Severity of hearing loss was  
480 determined from pure tone averages calculated at 0.5, 1.0, 2.0 and 4 kHz. Transient evoked  
481 otoacoustic emissions were tested. DNA was isolated from whole blood of the probands and  
482 panel (patients I and II) or exome (patient III) sequencing was performed as previously  
483 described<sup>14,36</sup>. Validation and segregation testing of the variants was performed.

484

### 485 *Animal and experimental model details*

486 Young mature Dunkin-Hartley guinea pigs of both sexes (250 - 450 g) were used for all  
487 experiments. Prior to decapitation all animals were tested for the Preyer reflex and then  
488 anesthetized with 18 – 24 mg of sodium pentobarbital intraperitoneally, according to their  
489 body weight. The left temporal bone was excised from the guinea pigs and attached to a  
490 custom-built holder. The holder allowed immersion of the cochlea and the middle ear in  
491 oxygenated (95 % O<sub>2</sub>, 5 % CO<sub>2</sub>) cell culture medium (Minimum Essential Medium with Earle's  
492 balanced salts, SH30244.FS Nordic Biolabs). The bone of the bulla was removed gently with  
493 bone cutters which exposed the middle ear and the basal turn of the cochlea, including the  
494 round window niche. Thereafter a small triangular or trapezoidal opening was made at the  
495 apex using a #11 scalpel blade and a hole of 0.6 mm diameter was drilled at the base of the  
496 cochlea using a straight point shaped pin. These openings allowed continuous perfusion of  
497 oxygenated tissue culture medium through an external syringe tube connected to the basal  
498 hole with a plastic microtube. Sound stimulation occurred through a calibrated loudspeaker  
499 connected to the chamber with a plastic tube. Because of the immersion of the middle ear  
500 and the opening at the apex, the effective sound pressure level was reduced by ~ 20 dB. The  
501 values given throughout the text are corrected for this attenuation. The whole preparation  
502 was maintained at room temperature (22 - 24°C). The apical opening allowed confocal

503 imaging of the hearing organ and permitted insertion of a double-barrel glass  
504 microelectrode filled with artificial endolymph-like solution (1.3 mM NaCl, 31 mM KHCO<sub>3</sub>, 23  
505 μM CaCl<sub>2</sub>, 128.3 mM KCl, pH 7.4 and 300 mOsmol/kg adjusted with sucrose) into the scala  
506 media through the Reissner's membrane (RM). This special electrode with septum is used for  
507 cochlear microphonic recordings (CM), electrical stimulation, endocochlear potential  
508 recordings (EP), bundle membrane staining and blockers delivery, as specified.

509

#### 510 *Reagents*

511 The following stock solutions were prepared and further diluted in artificial endolymph to  
512 the desired concentration to be used in the study. Di-3-ANEPPDHQ (D36801 ThermoFisher  
513 Scientific): 4.0 mM in pure DMSO diluted 100 times for use. Quinocarmycin analog DX-52-1  
514 (a kind gift from the US National Cancer Institute, 96251-59-1): 22.0 mM in 50% DMSO and  
515 phosphate-buffered saline diluted to 1.0 mM for use. Note that the effective concentration  
516 in the endolymph is lower than 1 mM because the agent is diluted in the scala media fluids  
517 upon injection. Previous estimates suggest a 10x dilution factor (16). Phenylarsine Oxide  
518 (P3075-1G Sigma Aldrich): 45.0 mM in pure DMSO diluted to 1.0 mM for use.

519

#### 520 *Confocal imaging*

521 Samples were imaged with an upright laser scanning confocal microscope (Zeiss LSM 780  
522 Axio Imager) controlled with the ZEN 2012 software. Outer hair cell bundle displacement  
523 movements were acquired with a 40X, 0.80 numerical aperture water immersion objective  
524 lens (Zeiss Achroplan or Nikon CFI Apo lens); immunofluorescence imaging was made with a  
525 100X oil immersion, 1.40 NA objective (Zeiss Plan-Apochromat). Images were processed in  
526 Imagej 1.50i software, Imaris 9.2, ZEN 2012 and Matlab (R2017b, the Mathworks, Natick,  
527 MA, USA) and schemes drawn in Inkscape 0.92.3.

528

#### 529 *Electrophysiological recordings*

530 Hair bundles were labeled with the membrane dye di-3-ANEPPDHQ which was dissolved in  
531 endolymph solution and delivered by electrophoresis. This protocol ensured minimal dye  
532 release into the scala media and produced strong labeling of stereocilia while preserving the  
533 barrier function of Reissner's membrane (RM). Double-barrel microelectrodes with an outer  
534 diameter of 1.5 mm were pulled with a standard electrode puller and beveled at 20 degrees  
535 to a final resistance of ~4 – 6 MΩ. The electrodes were mounted in a manual  
536 micromanipulator at an angle of 30 degrees and positioned through the apical opening close  
537 to the RM. The RM was penetrated using a hydraulic stepping motor. Current injections  
538 were performed with a linear stimulus isolator (A395, World Precision Instruments) sending  
539 positive steady state currents of up to + 14 μA. These currents restored the normal potential  
540 around the hair bundles, leading to an increase of the currents through the MET channel,  
541 and in the force produced by the hair cells. The endocochlear potential upon penetration of  
542 RM was ~25-30 mV. Cochlear microphonic potentials were measured with an Ix1 amplifier  
543 (Dagan Instruments) and digitized with a 24-bit A/D board (NI USB-4431, National

544 Instruments) at 10 kHz, using custom Labview software. Tuning curves were recorded in  
545 response to a series of tone bursts at 60 dB SPL ranging from 60 to 820 Hz. The rise and fall  
546 time was 1 ms, using a Hanning window. The samples signals were Fourier-transformed and  
547 the peak amplitude plotted as a function of stimulus frequency. Before applying drugs,  
548 tuning curve measurements were repeated every five minutes for 15-20 minutes to verify  
549 that the response was stable. We thereafter proceeded with other measurements, as  
550 described in the text.

551

#### 552 *Time-resolved confocal imaging*

553 To measure sound-evoked bundle motion, the hearing organ was faintly stained with 1  $\mu$ l of  
554 dye di-3- ANEPPDHQ added in the perfusion tube. Subsequently, the sensory hair cell  
555 bundles were stained with di-3-ANEPPDHQ dissolved in the electrode solution and delivered  
556 to the hair bundles iontophoretically with a current stimulus of 3-5  $\mu$ A. The preparation was  
557 stimulated acoustically near the bundles' best frequency (180 – 220 Hz). The best frequency  
558 was selected from the highest peak of the tuning curve of the cochlear microphonic  
559 recordings. Image acquisition triggered both the acoustical and electrical stimulus. A series  
560 of 37 images was acquired; each series requiring  $\sim$ 40 s for combined sound and current  
561 stimulus. Custom Labview software ensured that every pixel in the image series had a known  
562 phase both of the acoustic and electrical stimuli. To obtain images free from motion  
563 artefacts, the software tracked the temporal relation between the pixels and the sound  
564 stimulus. Image sequences free from motion artefacts were then reconstructed using a  
565 Fourier series approach<sup>19, 20</sup>, to generate a sequence of 12 images at equally spaced phases  
566 of the sine wave. Images for positive and negative current stimulation were also  
567 reconstructed at 12 equally spaced phases. These image sequences were low-pass filtered  
568 and subjected to optical flow analysis using a 2D version of the 3D algorithm described in ref.  
569 20. To improve the signal-to-noise ratio, trajectories for all pixels in a 3x3 or 5x5 region were  
570 averaged. For combined sound and electrical stimuli, current injection switched directly from  
571 positive to negative at 5 Hz to avoid charge build-up in the scala media.

572

#### 573 *Blocker injection*

574 For experiments in which blockers (DX-52-1 or PAO) were injected into the endolymphatic  
575 space through the double-barrel microelectrode, one barrel of the electrode was filled with  
576 the dye di-3-ANEPPDHQ dissolved in endolymph and the other contained the blocker  
577 dissolved in endolymph. Pipettes had 1.5-3  $\mu$ m tip diameter and were positioned 50-70  $\mu$ m  
578 from the hair bundles The blocker was pressure-injected by a 2 pound-per-square inch  
579 pressure pulse lasting for 10 s. To verify the injection, a time series of confocal images, 60 to  
580 100 s in length was acquired during each injection. Cochlear microphonic potentials (CM)  
581 were recorded before and at 5-minute intervals after the injection. Sets of confocal images  
582 of hair bundle displacement were recorded before (2 sets) and after injection (3-4 sets) and  
583 continued every five minutes for the next 30-40 minutes of the experiment time at a  
584 stimulus level of 80 dB SPL, 10  $\mu$ A at 220 Hz best frequency. The argon laser line at 488 nm

585 and matching beamsplitter was used. To avoid bleaching, the laser power was set to the  
586 minimum value consistent with an acceptable signal-to-noise ratio.

587

#### 588 *Fluorescence Recovery After Photobleaching (FRAP)*

589 FRAP was performed by outlining a region of interest on the stained stereocilia membrane.  
590 Following an acquisition of a series of 10 baseline images, a 2- $\mu$ m spot on the stereocilia  
591 membrane was photobleached by focusing the laser at a maximum power into the region of  
592 interest<sup>35</sup>. The recovery of fluorescence was tracked by acquiring a series of 30 images at 1  
593 or 3-s intervals over a time of 100 – 140 s. The images were 256 x 512 pixels, 12-bit pixel  
594 depth, with an integration time of 6.30  $\mu$ s per pixel, and a pinole of 1.50 Airy units. Confocal  
595 images were obtained before and 10 and 20 minutes apart after the blocker injection.  
596 Statistical analysis was performed by fitting the experimental data to a one-phase decay  
597 model.

598

#### 599 *Compound action potentials*

600 To record compound action potentials (CAPs), animals were anaesthetized with an initial  
601 dose of an intra-muscular injection of Xylazin (0.5ml/kg) and Ketalar (0.4ml/kg). Three to  
602 four minutes after the animal was adequately anesthetized, the surgical site of the left bulla  
603 was shaved and the animal placed on a thermostatically controlled heating blanket to  
604 maintain a core body temperature of 38°C. Bupivacain (0.2ml/kg), a long-acting local  
605 anaesthetic, was administered near the surgical site before skin incision. A retroauricular  
606 incision was made in order to reach the temporal bone. Muscle and other soft tissues were  
607 dissected, and the postero-lateral part of the auditory bulla was opened to access the round  
608 window niche. A thin Teflon-insulated Ag/AgCl silver ball recording electrode was placed in  
609 close contact with the round window membrane. The electrode wire was fixed to the  
610 temporal bone with dental cement to ensure the position of the recording electrode  
611 remained stable throughout the experiment. The animal was then placed inside a sound-  
612 proof recording booth where an Ag/AgCl electrode was inserted subcutaneously at the  
613 vertex of the skull. Cochlear compound action potentials were recorded sequentially from  
614 the left ear of the animal. Standardized input–output functions were generated by varying  
615 the intensity of stimulus (90 dB, 80 dB, 70 dB, 60 dB, 50 dB, 40 dB, 30 dB SPL in steps at 6  
616 different frequencies 2 kHz, 4 kHz, 8 kHz, 12 kHz, 16 kHz, 20 kHz). The recorded evoked CAPs  
617 signal was then filtered (high-pass frequency 3-5 Hz, low-pass frequency 3-5 kHz) and  
618 amplified at a gain of 10 000 and stored for offline analysis. The responses to 200 repetitions  
619 of each stimulus were averaged with a sampling rate of 100 kHz. Three sets of recordings  
620 were obtained before the blocker application, and recordings were repeated at 5-min  
621 intervals for the next 40 minutes after application of the blocker. Blockers were dissolved in  
622 artificial perilymph (137 mM NaCl, 5 mM KCl, 2 mM CaCl<sub>2</sub>, 1 mM MgCl<sub>2</sub>, 5 mM D-glucose, 5  
623 mM HEPES, pH 7.4, 300 mOsmol/kg) and introduced on the round window membrane. All  
624 recording software's were custom written in LabVIEW.

625



626 *Surface preparation and immunofluorescence staining and imaging*

627 Whole-mount preparations of the guinea pig organ of Corti were obtained as follows.  
628 Temporal bones were removed, the bony bulla was opened to visualize the cochlea and two  
629 small hole were made in the round window and at the apex. These openings allowed  
630 perfusion of the sensory epithelium with phosphate-buffered saline solution (PBS). The  
631 perilymphatic space was gently perfused with 4% paraformaldehyde in PBS. The sensory  
632 epithelium was exposed by carefully removing the cochlear bone, the spiral ligament, and  
633 the tectorial membrane. After washing the samples in PBS, they were permeabilized by  
634 treating with, 0.3% Triton X-100 soaked in 3% bovine serum albumin (BSA, 0332-25G, VWR),  
635 dissolved in PBS for 10 minutes at room temperature followed with one-time wash with PBS  
636 for 5 minutes. Permeabilization was followed with blocking step by incubating the samples  
637 for 2 hr in PBS containing 3% normal goat serum (NGS, 927503, BioLegend) and 3% BSA and  
638 then stained overnight at 4°C with the primary monoclonal antibody (mouse anti-radixin,  
639 ABNOH00005962-M06, Abnova) at a dilution of 1:500. Samples were then washed three  
640 times with PBS for 10 minutes each, followed by a 2 hr incubation with a mixture of the  
641 secondary antibody (goat anti-mouse Alexa Fluor® 488–conjugated IgG, ab150113 Abcam)  
642 and Alexa Fluor 568 conjugated Phalloidin (A12380, ThermoFisher Scientific) at a dilution of  
643 1:500. The antibody solutions were prepared in blocking solution. After three washes with  
644 PBS for 20 minutes each, sections were readied for surface preparations. Sections of organ  
645 of Corti starting from apex to base were carefully dissected and mounted on the glass slides  
646 prepared earlier and cover slipped with mounting media Fluorosave reagent (345789,  
647 Calbiochem). The slides were sealed and allowed to rest for ~2 h before proceeding with  
648 imaging. Confocal images of the mounted sections were obtained in two track channel mode  
649 with MBS 488/561 excited at 488 nm for Alexa Fluor 488 fluorescence, emission range  
650 between 490-570 nm and at 561 nm for Alexa Fluor 568 fluorescence, emission range  
651 between 570-695 nm. Z-stacks were acquired at 12-bit pixel depth, 512 x 512 pixels, with an  
652 integration time of 6.30  $\mu$ s per pixel, pinole of 1.0 Airy units and a spacing 1.0 or 3.0  $\mu$ m per  
653 slice with 20 slices up to 10  $\mu$ m in total depth.

654

655 *Fluorescence intensity quantification*

656 Identical experimental settings and analyses were used for quantifying both radixin and  
657 phalloidin immunofluorescence. Maximum projections of confocal z-stacks were acquired  
658 and used for analysis. Organ of Corti sections were fixed, immunostained, mounted, and  
659 imaged. For background subtraction, fluorescence intensity from randomly chosen areas per  
660 preparation, lacking specific signal, were averaged and subtracted from the respective  
661 images. Hair bundles were outlined manually in ImageJ, and the average fluorescence  
662 intensity was calculated for each individual hair bundle. Individual fluorescence intensity  
663 values of a given experiment were normalized to the global average of the corresponding  
664 preparations.

665

666 *Data evaluation and statistical analysis*

667 All experiments were repeated multiple times; the number of individual measurements and  
668 the number of preparations are included in the main body of the text and in the figure  
669 legends. Analyses were performed in Matlab and the statistical significance was assessed  
670 with Prism 8 (GraphPad Software, San Diego, CA, USA). Plots were generated in the Matlab  
671 and Prism softwares. Differences were analyzed with Student's paired/unpaired t test or  
672 two-way ANOVA when appropriate and were considered significant at  $p < 0.05$ . Details of the  
673 statistical tests used in each case are given in the text. Data expressed as mean  $\pm$  s.e.m or  
674 s.d. as indicated.  
675

676 **Acknowledgements**

677 This work was supported by grants from the Swedish Research Council (2018-02692 and  
678 2017-06092), the Torsten Söderberg foundation, AFA Försäkrings AB (170069), and the  
679 County Council of Östergötland (all to A.F.), the Fundación María Cristina Masaveu Peterson  
680 (to J.C. and R.C.) as well as the US National Institutes of Health (R01DC009645, to M.T.). We  
681 thank Anna Montell Magnusson for constructive criticism on earlier version of the  
682 manuscript.

683

684 **Author contributions**

685 A.F. and S.P. conceived and designed the study. S.P. performed experiments, data  
686 acquisition and analysis of experimental data. A.F. and S.P. contributed to the experimental  
687 methodology. S.P. and A.F. wrote the manuscript, together with J.C. and B.V. B.V. assisted in  
688 collaboration and G.B., M.C., R.G.-A., A.Fo., C.D.-P., M.D., J.C., R.C., A.S. and M.T. performed  
689 genetic and/or clinical analyses of the patients. All authors commented on the manuscript.

690

691

## 692 **Figure Legends**

693 **Figure 1. Hearing impairment in patients with *RDX* mutations.** Pedigrees of the families with non-syndromic  
694 sensorineural hearing loss (a: patient I, b: patient II, c: patient III and IV). The probands are shown with arrows.  
695 Open symbols: unaffected; filled symbols: affected. Audiograms and steady state evoked potentials showed  
696 different degrees of bilateral sensorineural hearing loss of affected individuals (red, right ear; blue, left ear). (A)  
697 Steady state evoked potentials revealed profound bilateral hearing loss in patient I at 16 months of age. (B)  
698 Steady state evoked potentials showed moderate bilateral sensorineural hearing loss at 8 months of age. (C).  
699 Audiogram of patient III showed profound bilateral sensorineural hearing loss at 8 years of age. The variant  
700 found in this patient was included in a list of mutations in hearing-loss genes (36), but no further information  
701 about the patient was provided. Hearing thresholds of all four patients show a sloping configuration ranging  
702 from mild (patient II) to severe (patients I, III and IV) sensorineural hearing loss at low frequencies and  
703 profound impairment at high frequencies.

704  
705 **Figure 2. Radixin expression and localization in guinea pig cochlear hair cells.** (A) Schematic diagram showing  
706 the putative function of radixin in stereocilia. (B) A low magnification image of the temporal bone preparation.  
707 Note the apical opening used for imaging. (C) Release of the dye di-3-ANEPPDHQ into the endolymphatic space  
708 stained Reissner's membrane as well as the hair bundles. (D) Outer hair cell (OHC) stereocilia imaged during  
709 sound stimulation at 220 Hz, 80 dB SPL. (E) Representative confocal images of sections of the organ of Corti  
710 labelled with a radixin-specific monoclonal antibody (green) as well as phalloidin (red, staining actin), and  
711 overlay. The bundles of the sensory hair cells are intensely labeled by the radixin antibody. OHC 1, 2, 3 indicate  
712 the three rows of outer hair cells. Images were taken from the surface preparations of the apical turn. (E') Inset  
713 showing a higher magnification view. (F) Three-dimensional reconstruction of the organ of Corti. A close-up on  
714 the inner hair cell area shows absence of radixin label in the cell bodies of the inner hair cells. Likewise, no  
715 radixin label was detected in the neuronal or synaptic region of the inner hair cells (right side). (G) A 3D  
716 reconstruction of outer hair cell stereocilia showing predominance of radixin labeling near the stereocilia base  
717 and consistent actin labeling in the hair cell body and stereocilia bundles. (H) Normalized average signal  
718 intensity profiles for radixin and actin expression (average of 11 bundles from 3 different animals) which shows  
719 decline in radixin labeling toward the tip of stereocilia and consistent actin labeling by phalloidin throughout  
720 the stereocilia. (I) Scatter plot showing lack of relation between radixin and phalloidin (staining actin) pixel  
721 intensities. A.u., arbitrary units.

722  
723 **Figure 3. DX-52-1 induced effects in the OHC stereocilia functions.** (A) Schematic showing how DX-52-1  
724 disrupts radixin's ability to interact with both actin, cell adhesion molecules and transmembrane proteins. (B)  
725 Time-resolved confocal images acquired during sound stimulation showing the morphology of the OHC bundle  
726 is intact before and after drug injection, except for a small change in the brightness of the fluorescent dye. (C)  
727 Sound-evoked motion of the bundle tip (red) and base (blue) before (left) and after (right) DX-52-1 injection in  
728 an example preparation. The stimulus was a pure tone at 220 Hz and 80 dB sound pressure level. By subtracting  
729 trajectories from the tips and bases of stereocilia, a measure of the deflection of the bundle (green) is  
730 obtained. (D) Time course of the averaged deflection amplitude of outer hair cell bundles (blue circle). The  
731 vertical line at time zero indicates the time of injection. Data were normalized to the average trajectory  
732 amplitude recorded before injection. Averaged data from 70 individual preparations  $\pm$  standard error of the  
733 mean. (E) Confocal image obtained after DMSO injection, showing lack of effect on stereocilia morphology. (F)  
734 No change in the motion of the bundle tip (red) and base (blue) before and after DMSO injection observed  
735 along with absence of change in deflection (green). (G - I) Averaged bundle motion change at the base of outer  
736 hair cell stereocilia (blue bar), at their tip (red bar) and the deflection of the bundle (green bar). Data were  
737 normalized to the base trajectory amplitude recorded before the injection. Averaged data from 70 individual  
738 preparations  $\pm$  s.d. (J) An OHC stereocilia bundle showing change in electrically evoked motility. Images before  
739 and after DX-52-1 were superimposed. (K) Time course of the averaged electromotility amplitude showing  
740 increase after DX-52-1 injection. The vertical line at time zero indicates the time of injection. Data were

741 normalized to the average electromotility amplitude recorded before injection. (L) On average the  
742 electromotility amplitude increased significantly after the DX-52-1 injection (n=70) with no significant change  
743 after DMSO injection (n=15). The acoustic stimulus is a 220Hz tone at 80 dB with current stimulus of 10  $\mu$ A. (M)  
744 FRAP experiment showing no change in the stereocilia bundle morphology before and after DX-52-1 injection,  
745 except for slight change in the dye intensity. (N) Normalized traces of the fluorescence intensity showing  
746 change in the membrane dynamics during the fluorescence recovery in the bundle region of interest measuring  
747 the diffusion time of the dye before and after injection averaged across 15 preparations. (O) Fitting the  
748 experimental data to single phase exponential fit model showed a significantly faster recovery of bundle  
749 fluorescence with reduced  $\tau_{1/2}$  after DX-52-1 injection (n=24) with no change in the diffusion time after DMSO  
750 injection (n=14). (P) Tuning curves for the cochlear microphonic potential (CM) before and after 1.0 mM DX-52-  
751 1 injection in an example preparation. The amplitude of the CM decreased by 138  $\mu$ V at its peak. (Q) Averaged  
752 time courses of the normalized mean peak amplitude of the cochlear microphonic potential which decreased  
753 substantially 10-15 minutes after DX-52-1 injection (n=40) but not significantly after DMSO (n=11). The vertical  
754 line indicates the time of injection of DX-52-1 and DMSO. (R) Comparison of the CM amplitude which reduced  
755 significantly before and after DX-52-1 injection but not after DMSO injection for experiments in panel Q. A  
756 significant difference in the microphonic amplitude was observed between DX-52-1 and DMSO. All data sets  
757 were normalized to the data recorded before injection. Data are the means  $\pm$  s.e.m or s.d. (G-I). \*\*\*\*P<0.0001;  
758 \*\*\*P<0.001; \*\*P<0.01; \*P<0.05; n.s., not significant; two-tailed paired t test, two-tailed unpaired t test with  
759 Welch's correction.

760

761 **Figure 4. DX-52-1 results in declining hearing sensitivity, as assessed by the compound action potential of the**  
762 **auditory nerve. (A)** Schematic showing the CAP recordings for control (black) and DX-52-1(red) treated guinea  
763 pigs. (B) Average CAP amplitude to 60 dB SPL stimuli shows a reduction for the DX-52-1 animals compared to  
764 control. (C) Grand averages  $\pm$  s.e.m (dotted) of the CAP waveforms to 60 dB stimuli shows reduction in N1 and  
765 N2 amplitudes. (D) Averaged time courses of the changes seen in N1 amplitude measured at 60 dB SPL 8-kHz  
766 stimulus following DX-52-1 application, relative to those before the application, which decreased significantly  
767 after 15-20 minutes of application. (E). Comparison of the CAP N1 latency which increased slightly after DX-52-  
768 1 application for animals in panel C. (F) Representative waveforms of the cochlear microphonic potential (CM),  
769 reflecting OHC activation before and after 20 minutes of application of 1 mM DX-52-1. The stimulus was a 8-  
770 KHz tone burst at 90 dB SPL. The vertical line at time zero indicates the time of application. Data information:  
771 DMSO (n=10), DX-52-1 (n=18). \*\*\*\*P<0.0001; \*\*\*P<0.001; \*\*P<0.01; \*P<0.05; ns, not significant; two-way  
772 ANOVA coupled to the Bonferroni post hoc test, two-tailed unpaired t test with Welch's correction. Data are  
773 the means  $\pm$  s.e.m.

774

775 **Figure 5. PAO induced effects in the OHC stereocilia functions. (A)** A schematic demonstrating the mechanism  
776 for the regulation of radixin protein via PIP2 binding. PAO inhibits the synthesis of PIP2 by blocking PI4 kinase,  
777 thus decreasing the levels of PIP2 and preventing activation of radixin. (B) Time-resolved confocal image of an  
778 OHC stereocilia bundle showing the morphology is intact before and after the injection, except for a small  
779 change in the brightness of the fluorescent dye. (C) Representative data showing change in sound-evoked  
780 motion of the bundle tip (red) and base (blue) before and after PAO injection. (D) Time course of the averaged  
781 deflection amplitude of outer hair cell stereocilia bundle (blue circle) showing decrease after PAO injection. The  
782 vertical line at time zero indicates the time of injection of PAO. Data were normalized to the average trajectory  
783 amplitude recorded before injection. Averaged data from 35 individual preparations  $\pm$  s.e.m. (E-G) Averaged  
784 change of the bundle motion at the base of outer hair cell stereocilia (blue bar), at their tip (red bar) and  
785 deflection (green bar) shown. Significant decrease in tip and base motion resulting in a change in the bundle  
786 deflection. Data were normalized to the base trajectory amplitude recorded before the injection. Mean data  
787 from 35 individual preparations  $\pm$  s.d. (H) An OHC bundle showing electrically evoked cell motility change color-  
788 coded displacement data superimposed before and after PAO injection. (I) The average electromotility  
789 amplitude increased non-significantly 30 nm after the PAO injection. Data from 28 individual preparations. The  
790 acoustic stimulus is a 220 Hz tone at 80 dB with current stimulus of 10  $\mu$ A. (J) No change in the stereocilia

791 bundle morphology seen before and after PAO injection for FRAP experiment. **(K)** Normalized traces of the  
792 fluorescence intensity during fluorescence recovery in the bundle region of interest measuring the diffusion  
793 time of the dye before and after injection averaged across 22 preparations. **(L)** Fitting the experimental data to  
794 single phase exponential fit model showed a faster recovery of the bundle fluorescence with reduced  $\tau_{1/2}$  after  
795 PAO injection on average for experiments in panel **N**. **(M)** Tuning curves for the cochlear microphonic potential  
796 before and after 1.0 mM PAO injection in an example preparation. The amplitude of the cochlear microphonic  
797 potential decreased by 320  $\mu$ V at its peak. **(N)** Normalized mean peak amplitude of the averaged time courses  
798 of the cochlear microphonic potential showing substantial irreversible decrease 10-15 minutes after PAO  
799 injection (n=33). The vertical line indicates the time of injection of PAO. **(O)** Comparison of cochlear  
800 microphonic potential amplitude before and after PAO injection which reduced significantly for experiments in  
801 panel n. Data were normalized to the data recorded before the injection. Data are the means  $\pm$  s.e.m or s.d. **(E-**  
802 **G)**. \*\*\*\*P<0.0001; \*\*P<0.01; \*P<0.05; n.s., not significant; two-tailed paired t test.

803

804 **Figure 6. Radixin is required for maintaining the mechanical stability of stereocilia and hearing sensitivity.**

805 Schematic diagram of outer hair cell stereocilia with radixin binding area. The top scheme represents the  
806 molecular interactions between radixin and F-actin cytoskeleton and the transmembrane protein CD 44. In the  
807 hearing organ of animals where the radixin blocker DX-52-1 was not applied, the animals had normal hearing  
808 and stereocilia functions. Application of the blocker results in a disruption of the link between radixin and F-  
809 actin. The animal had reduced hearing sensitivity and large effects on the OHC stereocilia functions were  
810 evident.

811

812

## 813 References

1. Kitajiri S, Fukumoto K, Hata M, Sasaki H, Katsuno T, Nakagawa T, Ito J, Tsukita S, Tsukita S. Radixin deficiency causes deafness associated with progressive degeneration of cochlear stereocilia. *J Cell Biol.* 2004;166(4):559-70.
2. Khan SY, Ahmed ZM, Shabbir MI, Kitajiri S, Kalsoom S, Tasneem S, Shayiq S, Ramesh A, Srisailpathy S, Khan SN, Smith RJ, Riazuddin S, Friedman TB, Riazuddin S. Mutations of the *RDX* gene cause nonsyndromic hearing loss at the DFNB24 locus. *Hum Mut.* 2007;28,417–23.
3. Shearer AE, Hildebrand MS, Bromhead CJ, Kahrizi K, Webster JA, Azadeh B, Kimberling WJ, Anousheh A, Nazeri A, Stephan D, Najmabadi H, Smith RJ, Bahlo M. A novel splice site mutation in the *RDX* gene causes DFNB24 hearing loss in an Iranian family. *Am J Med Genet A.* 2009;149A(3):555-8.
4. Pataky F, Pironkova R, Hudspeth AJ. Radixin is a constituent of stereocilia in hair cells. *Proc Natl Acad Sci U S A* 2004;101,2601–2606.
5. Shin JB, Krey JF, Hassan A, Metlagel Z, Tauscher AN, Pagana JM, Sherman NE, Jeffery ED, Spinelli KJ, Zhao H, Wilmarth PA, Choi D, David LL, Auer M, Barr-Gillespie PG. Molecular architecture of the chick vestibular hair bundle. *Nat Neurosci.* 2013;16,365–374.
6. Hirano M, Denis CS, Richardson GP, Gillespie PG. Hair Cells Require Phosphatidylinositol 4,5-Bisphosphate for Mechanical Transduction and Adaptation. *Neuron* 2004;44,309–320.
7. Pelaseyed T, and Bretscher A. Regulation of actin-based apical structures on epithelial cells. *J Cell Sci.* 2018;131(20).
8. Kunda P, Pelling AE, Liu T, Baum B. Moesin Controls Cortical Rigidity, Cell Rounding, and Spindle Morphogenesis during Mitosis. *Curr Biol.* 2008;18,91–101.
9. Brownell WE, Bader CR, Bertrand D, de Ribaupierre Y. Evoked mechanical responses of isolated cochlear outer hair cells. *Science* 1985;227,194–6.
10. Martin P, Mehta AD, Hudspeth AJ. Negative hair-bundle stiffness betrays a mechanism for mechanical amplification by the hair cell. *Proc Natl Acad Sci USA* 2000;97: 12026–12031.
11. Kennedy HJ, Crawford AC, Fettiplace R. Force generation by mammalian hair bundles supports a role in cochlear amplification. *Nature* 2005;433:880–883.
12. Meaud J, Grosh K. Coupling active hair bundle mechanics, fast adaptation, and somatic motility in a cochlear model. *Biophys J* 2011;100:2576 – 85.
13. Berninger E. Characteristics of normal newborn transient-evoked otoacoustic emissions: Ear asymmetries and sex effects. *Int J Audiol.* 2007;46,661–69.
14. Cabanillas R, Dineiro M, Cifuentes GA, Castillo D, Pruneda PC, Alvarez R, Sanchez-Duran N, Capin R, Plasencia A, Viejo-Diaz M, Garcia-Gonzalez N, Hernando I, Llorente JL, Reparaz-Andrade A, Torreira-Banzas C, Rosell J, Govea N, Gomez-Martinez JR, Nunez-Batalla F, Garrote JA, Mazon-Gutierrez A, Costales M, Isidoro-Garcia M, Garcia-Berrocal B, Ordonez GR, Cadinanos, J. Comprehensive genomic diagnosis of non-syndromic and syndromic hereditary hearing loss in Spanish patients. *BMC Med Genom.* 2018;11:58
15. Warren RL, Ramamoorthy S, Ciganovic N, Zhang Y, Wilson TM, Petrie T, Wang RK, Jacques SL, Reichenbach T, Nuttall AL, Fridberger A. Minimal basilar membrane motion in low-frequency hearing. *Proc Natl Acad Sci U S A* 2016;113,4304–10.
16. Strimbu CE, Prasad S, Hakizimana P, Fridberger A. Control of hearing sensitivity by tectorial membrane calcium. *Proc Natl Acad Sci U S A* 2019;116,5756–5764.
17. Zhao H, Williams DE, Shin J-B, Brügger B, Gillespie PG. Large membrane domains in hair bundles specify spatially constricted radixin activation. *J Neurosci.* 2012;32,4600–4609.
18. Gagnon LH, Longo-Guess CM, Berryman M, Shin J-B, Saylor KW, Yu H, Gillespie PG, Johnson KR. The chorlido intracellular channel protein CLIC5 is expressed at high levels in hair cell stereocilia and is essential for normal inner ear function. *J Neurosci.* 2006;26,10188–10198.
19. Jacob S, Tomo I, Fridberger A, Boutet de Monvel J, Ulfendahl M. Rapid confocal imaging for measuring the sound-induced motion of the hearing organ. *J Biomed Opt.* 2007;12,0211005.
20. von Tiedemann M, Fridberger A, Ulfendahl M, Boutet de Monvel J. Brightness-compensated 3-D optical flow algorithm for monitoring cochlear motion patterns. *J Biomed Opt.* 2010;15,056012.
21. Kahsai AW, Zhu S, Wardrop DJ, Lane WS, Fenteany G. Quinocarmycin analog DX-52-1 inhibits cell migration and targets radixin, disrupting interactions of radixin with actin and CD44. *Chem Biol.* 2006;13,973–83.
22. Kahsai AW, Zhu S, Fenteany G. G protein-coupled receptor kinase 2 activates radixin, regulating membrane protrusion and motility in epithelial cells. *Biochim Biophys Acta* 2010;1803,300–310.

- 
23. Jacob S, Pienkowski M, Fridberger A. The endocochlear potential alters cochlear micromechanics. *Biophys J*. 2011;100,2586–94.
  24. Oghalai JS, Tran TD, Raphael RM, Nakagawa T, Brownell WE. Transverse and lateral mobility in outer hair cell lateral wall membranes. *Hear Res*. 1999;135,19–28.
  25. Huang P, Zhang YH, Zheng XW, Liu YJ, Zhang H, Fang L, Zhang YW, Yang C, Islam K, Wang C, Naranmandura H. Phenylarsine oxide (PAO) induces apoptosis in HepG2 cells via ROS-mediated mitochondria and ER-stress dependent signaling pathways. *Metallomics* 2017;9,1756-1764.
  26. Bahloul A, Simmler MC, Michel V, Leibovici M, Perfettini I, Roux I, Weil D, Nouaille S, Zuo J, Zadro C, Licastro D, Gasparini P, Avan P, Hardelin JP, Petit C. Vezatin, an integral membrane protein of adherens junctions, is required for the sound resilience of cochlear hair cells. *EMBO Mol Med*. 2009;1,125–38.
  27. Fehon RG, McClachey AI, Bretscher A. Organizing the cell cortex: the role of ERM proteins. *Nat Rev Mol Cell Biol*. 2010;11,276–287.
  28. Tobin M, Chaiyasitdhi A, Michel V, Michalski N, Martin P. Stiffness and tension gradients of the hair cell's tip-link complex in the mammalian cochlea. *eLife* 2019;8,43473.
  29. Chen F, Zha D, Fridberger A, Zheng J, Choudhury N, Jacques SL, Wang RK, Shi X, Nuttall AL. A differentially amplified motion in the ear for near-threshold sound detection. *Nat Neurosci*. 2011;14,770–74.
  30. Ramamoorthy S, Zha D, Chen F, Jacques SL, Wang R, Choudhury N, Nuttall AL, Fridberger A. Filtering of acoustic signals within the hearing organ. *J Neurosci*. 2014;34,9051–58.
  31. Weichbold V, Nekahm-Heis D, Welzl-Mueller K. Universal newborn hearing screening and postnatal hearing loss. *Pediatrics* 2006;117,631–6.
  32. Young NM, Reilly BK, Burke L. Limitations of universal newborn hearing screening in early identification of pediatric cochlear implant candidates. *Arch Otolaryngol Head Neck Surg*. 2011;137,230–4.
  33. Dedhia K, Kitsko D, Sabo D, Chi DH. Children with sensorineural hearing loss after passing the newborn hearing screen. *JAMA Otolaryngol Head Neck Surg*. 2013; 139,119–23.
  34. Niparko JK, Tobey EA, Thal DJ, Eisenberg LS, Wang NY, Quittner AL, Fink NE; CDaCI Investigative Team. Spoken language development in children following cochlear implantation. *JAMA* 2010;303,1498–506.
  35. Boutet de Monvel J, Brownell WE, Ulfendahl M. Lateral Diffusion Anisotropy and Membrane Lipid/Skeleton Interaction in Outer Hair Cells. *Biophys J*. 2006;91,364-381.
  36. Bademci G, Foster J 2nd, Mahdieh N, Bonyadi M, Duman D, Cengiz FB, Menendez I, Diaz-Horta O, Shirkavand A, Zeinali S, Subasioglu A, Tokgoz-Yilmaz S, Huesca-Hernandez F, de la Luz Arenas-Sordo M, Dominguez-Aburto J, Hernandez-Zamora E, Montenegro P, Paredes R, Moreta G, Vinueza R, Villegas F, Mendoza-Benitez S, Guo S, Bozan N, Tos T, Incesulu A, Sennaroglu G, Blanton SH, Ozturkmen-Akay H, Yildirim-Baylan M, Tekin M. Comprehensive analysis via exome sequencing uncovers genetic etiology in autosomal recessive nonsyndromic deafness in a large multiethnic cohort. *Genet Med*. 2016;18,364–71.



## Figures

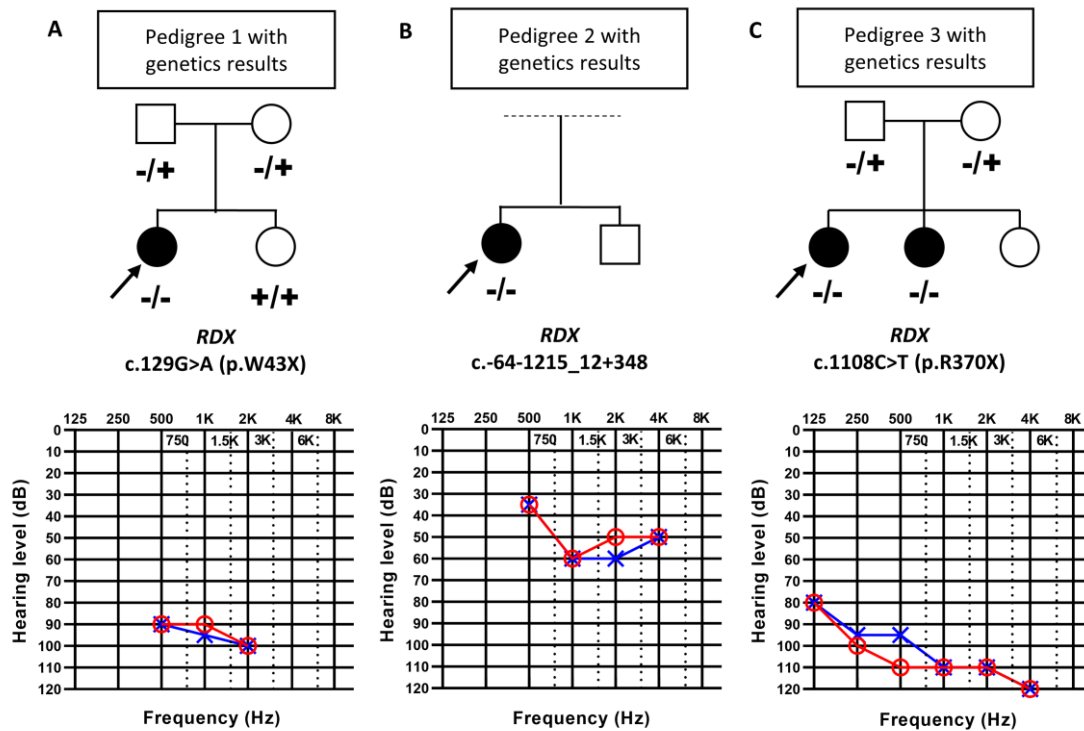

**Figure 1. Hearing impairment in patients with *RDX* mutations.** Pedigrees of the families with non-syndromic sensorineural hearing loss (a: patient I, b: patient II, c: patient III and IV). The probands are shown with arrows. Open symbols: unaffected; filled symbols: affected. Audiograms and steady state evoked potentials showed different degrees of bilateral sensorineural hearing loss of affected individuals (red, right ear; blue, left ear). (A) Steady state evoked potentials revealed profound bilateral hearing loss in patient I at 16 months of age. (B) Steady state evoked potentials showed moderate bilateral sensorineural hearing loss at 8 months of age. (C). Audiogram of patient III showed profound bilateral sensorineural hearing loss at 8 years of age. The variant found in this patient was included in a list of mutations in hearing-loss genes (36), but no further information about the patient was provided. Hearing thresholds of all four patients show a sloping configuration ranging from mild (patient II) to severe (patients I, III and IV) sensorineural hearing loss at low frequencies and profound impairment at high frequencies.

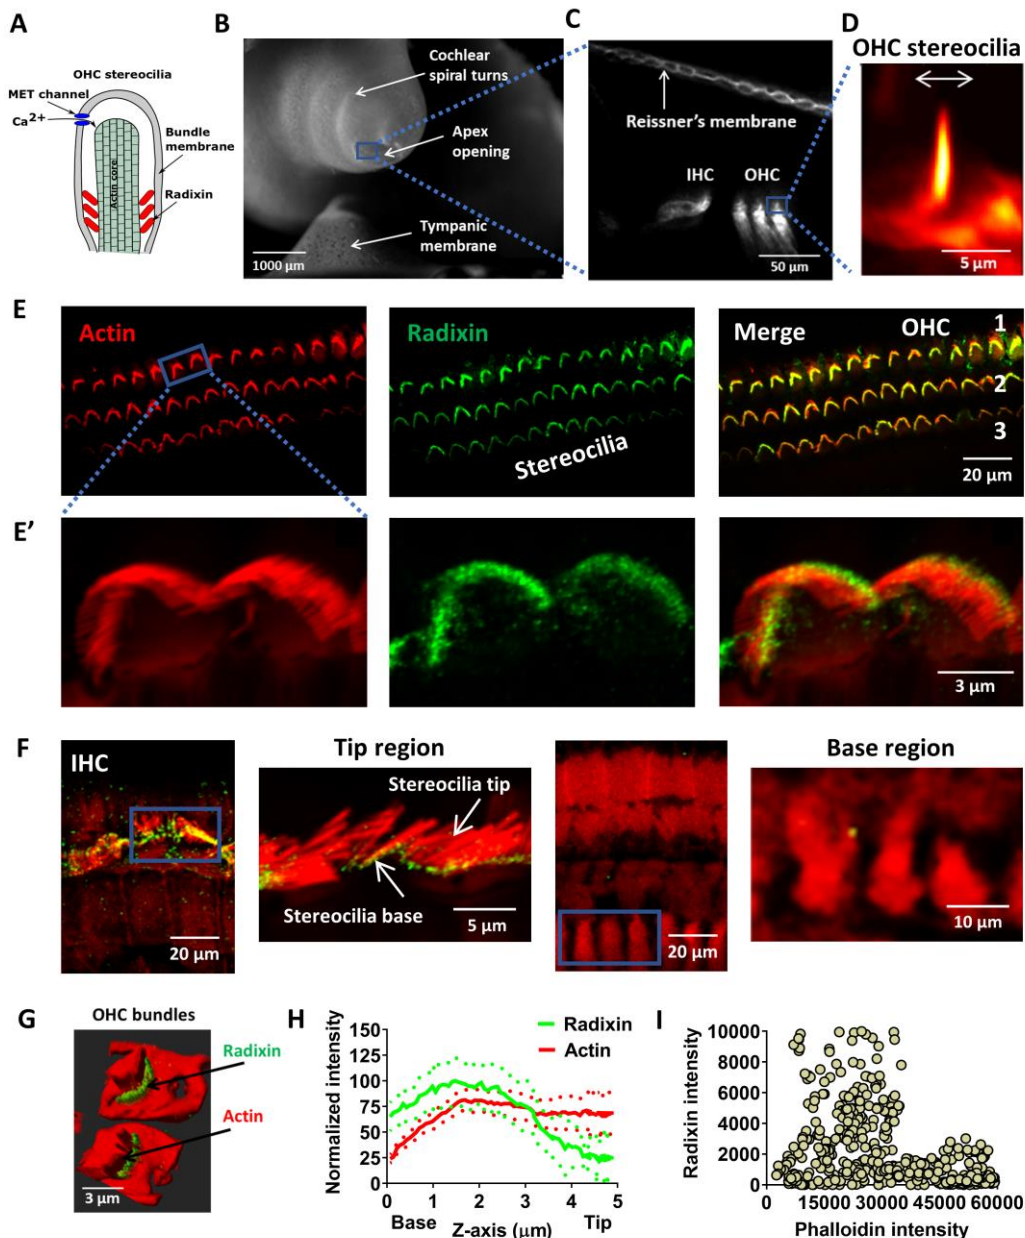

**Figure 2. Radixin expression and localization in guinea pig cochlear hair cells.** (A) Schematic diagram showing the putative function of radixin in stereocilia. (B) A low magnification image of the temporal bone preparation. Note the apical opening used for imaging. (C) Release of the dye di-3-ANEPPDHQ into the endolymphatic space stained Reissner's membrane as well as the hair bundles. (D) Outer hair cell (OHC) stereocilia imaged during sound stimulation at 220 Hz, 80 dB SPL. (E) Representative confocal images of sections of the organ of Corti labelled with a radixin-specific monoclonal antibody (green) as well as phalloidin (red, staining actin), and overlay. The bundles of the sensory hair cells are intensely labeled by the radixin antibody. OHC 1, 2, 3 indicate the three rows of outer hair cells. Images were taken from the surface preparations of the apical turn. (E') Inset showing a higher magnification view. (F) Three-dimensional reconstruction of the organ of Corti. A close-up on the inner hair cell area shows absence of radixin label in the cell bodies of the inner hair cells. Likewise, no radixin label was detected in the neuronal or synaptic region of the inner hair cells (right side). (G) A 3D reconstruction of outer hair cell stereocilia showing predominance of radixin labeling near the stereocilia base and consistent actin labeling in the hair cell body and stereocilia bundles. (H) Normalized average signal intensity profiles for radixin and actin expression (average of 11 bundles from 3 different animals) which shows

decline in radixin labeling toward the tip of stereocilia and consistent actin labeling by phalloidin throughout the stereocilia. (I) Scatter plot showing lack of relation between radixin and phalloidin (staining actin) pixel intensities. A.u., arbitrary units.

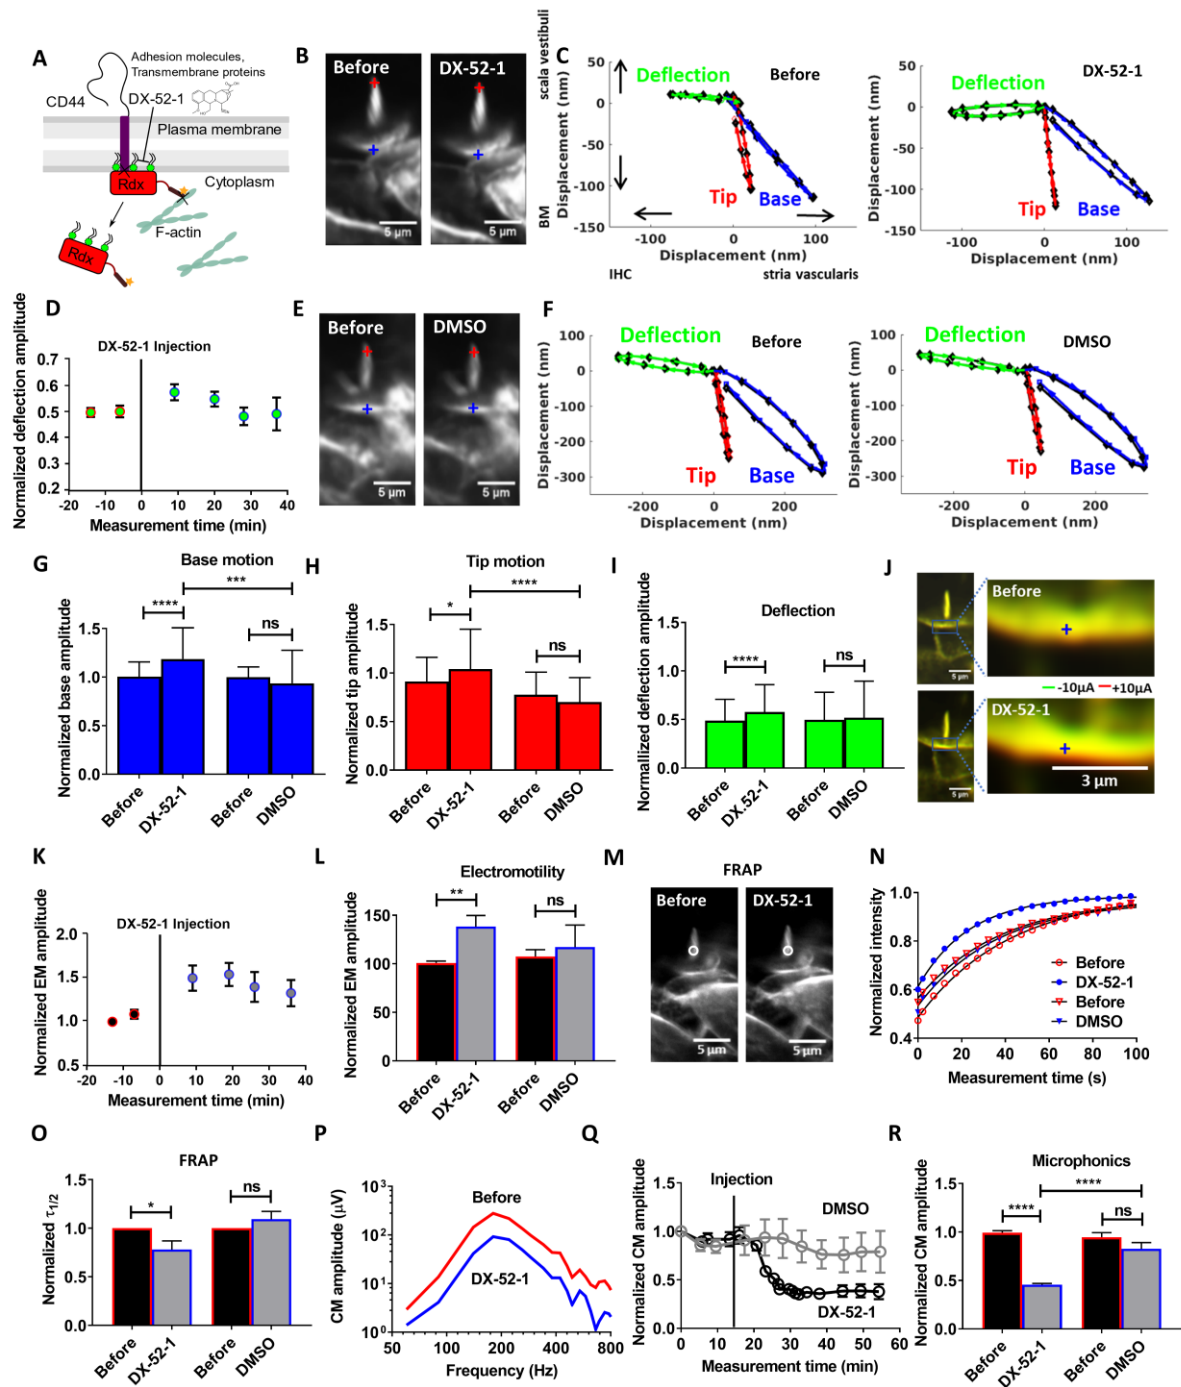

**Figure 3. DX-52-1 induced effects in the OHC stereocilia functions.** (A) Schematic showing how DX-52-1 disrupts radixin's ability to interact with both actin, cell adhesion molecules and transmembrane proteins. (B) Time-resolved confocal images acquired during sound stimulation showing the morphology of the OHC bundle is intact before and after drug injection, except for a small change in the brightness of the fluorescent dye. (C) Sound-evoked motion of the bundle tip (red) and base (blue) before (left) and after (right) DX-52-1 injection in an example preparation. The stimulus was a pure tone at 220 Hz and 80 dB sound pressure level. By subtracting

---

trajectories from the tips and bases of stereocilia, a measure of the deflection of the bundle (green) is obtained. **(D)** Time course of the averaged deflection amplitude of outer hair cell bundles (blue circle). The vertical line at time zero indicates the time of injection. Data were normalized to the average trajectory amplitude recorded before injection. Averaged data from 70 individual preparations  $\pm$  standard error of the mean. **(E)** Confocal image obtained after DMSO injection, showing lack of effect on stereocilia morphology. **(F)** No change in the motion of the bundle tip (red) and base (blue) before and after DMSO injection observed along with absence of change in deflection (green). **(G - I)** Averaged bundle motion change at the base of outer hair cell stereocilia (blue bar), at their tip (red bar) and the deflection of the bundle (green bar). Data were normalized to the base trajectory amplitude recorded before the injection. Averaged data from 70 individual preparations  $\pm$  s.d. **(J)** An OHC stereocilia bundle showing change in electrically evoked motility. Images before and after DX-52-1 were superimposed. **(K)** Time course of the averaged electromotility amplitude showing increase after DX-52-1 injection. The vertical line at time zero indicates the time of injection. Data were normalized to the average electromotility amplitude recorded before injection. **(L)** On average the electromotility amplitude increased significantly after the DX-52-1 injection ( $n=70$ ) with no significant change after DMSO injection ( $n=15$ ). The acoustic stimulus is a 220Hz tone at 80 dB with current stimulus of 10  $\mu$ A. **(M)** FRAP experiment showing no change in the stereocilia bundle morphology before and after DX-52-1 injection, except for slight change in the dye intensity. **(N)** Normalized traces of the fluorescence intensity showing change in the membrane dynamics during the fluorescence recovery in the bundle region of interest measuring the diffusion time of the dye before and after injection averaged across 15 preparations. **(O)** Fitting the experimental data to single phase exponential fit model showed a significantly faster recovery of bundle fluorescence with reduced  $\tau_{1/2}$  after DX-52-1 injection ( $n=24$ ) with no change in the diffusion time after DMSO injection ( $n=14$ ). **(P)** Tuning curves for the cochlear microphonic potential (CM) before and after 1.0 mM DX-52-1 injection in an example preparation. The amplitude of the CM decreased by 138  $\mu$ V at its peak. **(Q)** Averaged time courses of the normalized mean peak amplitude of the cochlear microphonic potential which decreased substantially 10-15 minutes after DX-52-1 injection ( $n=40$ ) but not significantly after DMSO ( $n=11$ ). The vertical line indicates the time of injection of DX-52-1 and DMSO. **(R)** Comparison of the CM amplitude which reduced significantly before and after DX-52-1 injection but not after DMSO injection for experiments in panel **Q**. A significant difference in the microphonic amplitude was observed between DX-52-1 and DMSO. All data sets were normalized to the data recorded before injection. Data are the means  $\pm$  s.e.m or s.d. **(G-I)**. \*\*\*\* $P<0.0001$ ; \*\*\* $P<0.001$ ; \*\* $P<0.01$ ; \* $P<0.05$ ; n.s., not significant; two-tailed paired t test, two-tailed unpaired t test with Welch's correction.

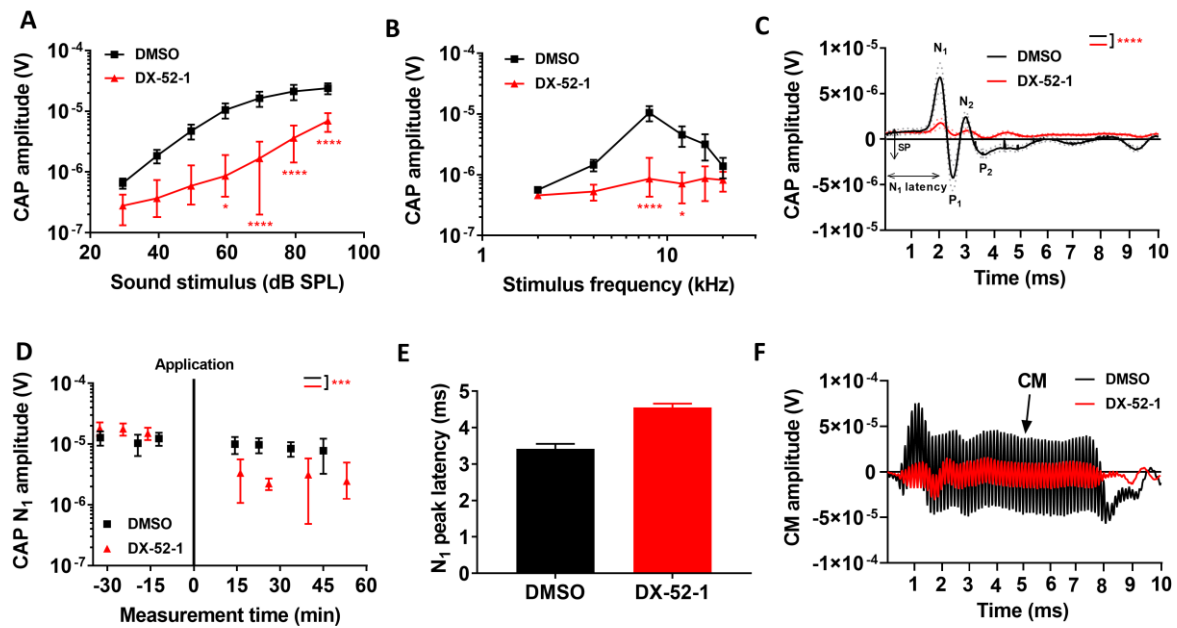

**Figure 4. DX-52-1 results in declining hearing sensitivity, as assessed by the compound action potential of the auditory nerve.** (A) Schematic showing the CAP recordings for control (black) and DX-52-1 (red) treated guinea pigs. (B) Average CAP amplitude to 60 dB SPL stimuli shows a reduction for the DX-52-1 animals compared to control. (C) Grand averages  $\pm$  s.e.m (dotted) of the CAP waveforms to 60 dB SPL 8-kHz stimuli shows reduction in N1 and N2 amplitudes. (D) Averaged time courses of the changes seen in N1 amplitude measured at 60 dB SPL 8-kHz stimulus following DX-52-1 application, relative to those before the application, which decreased significantly after 15-20 minutes of application. (E). Comparison of the CAP N1 latency which increased slightly after DX-52-1 application for animals in panel C. (F) Representative waveforms of the cochlear microphonic potential (CM), reflecting OHC activation before and after 20 minutes of application of 1 mM DX-52-1. The stimulus was a 8-KHz tone burst at 90 dB SPL. The vertical line at time zero indicates the time of application. Data information: DMSO (n=10), DX-52-1 (n=18). \*\*\*\*P<0.0001; \*\*\*P<0.001; \*\*P<0.01; \*P<0.05; ns, not significant; two-way ANOVA coupled to the Bonferroni post hoc test, two-tailed unpaired t test with Welch's correction. Data are the means  $\pm$  s.e.m.

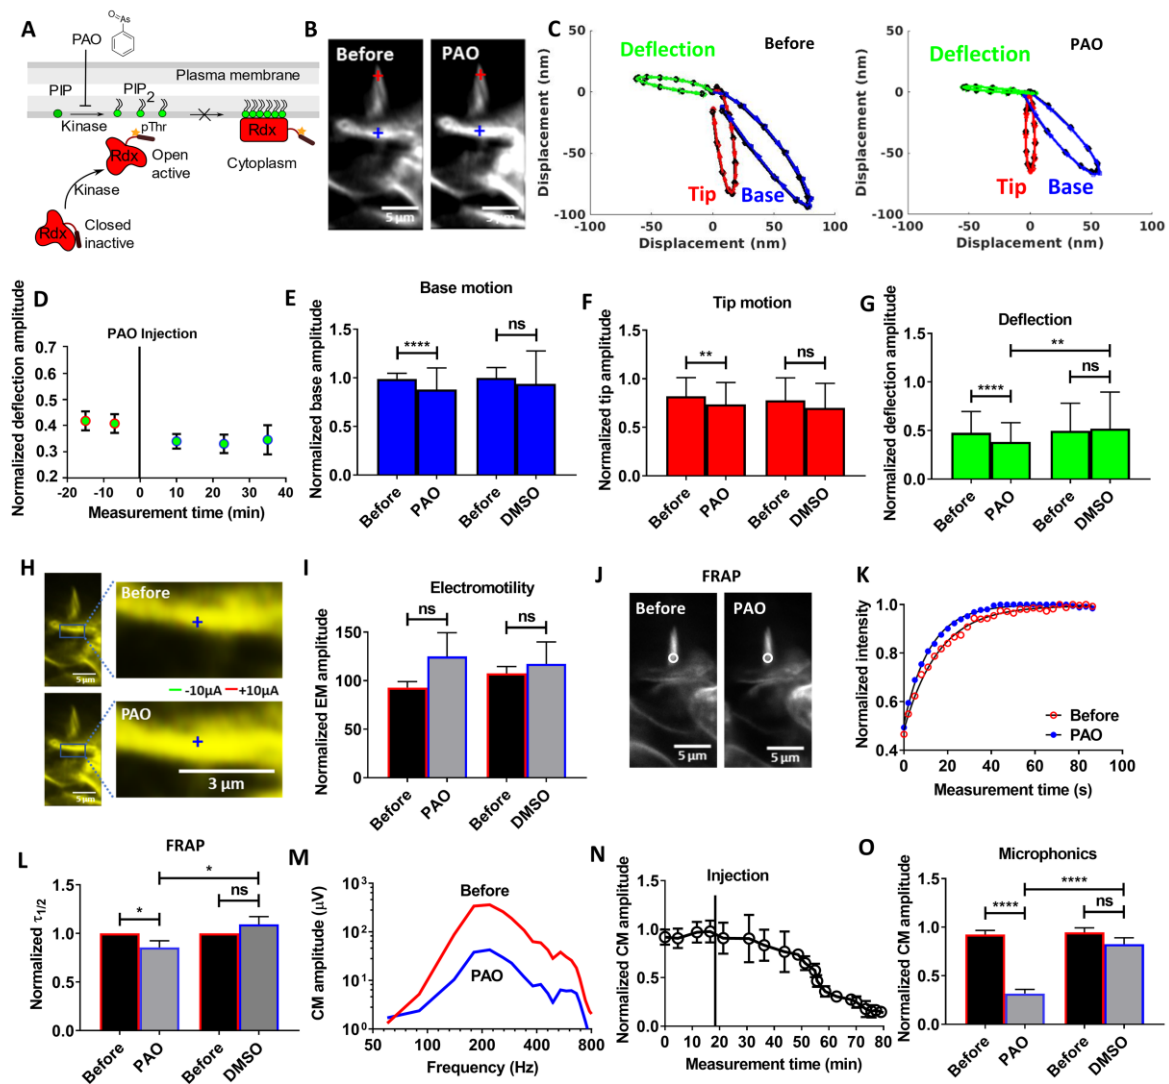

**Figure 5. PAO induced effects in the OHC stereocilia functions.** (A) Schematic demonstrating the mechanism for the regulation of radixin protein via PIP<sub>2</sub> binding. PAO inhibits the synthesis of PIP<sub>2</sub> by blocking PI4 kinase, thus decreasing the levels of PIP<sub>2</sub> and preventing activation of radixin. (B) Time-resolved confocal image of an OHC stereocilia bundle showing the morphology is intact before and after the injection, except for a small change in the brightness of the fluorescent dye. (C) Representative data showing change in sound-evoked motion of the bundle tip (red) and base (blue) before and after PAO injection. (D) Time course of the averaged deflection amplitude of outer hair cell stereocilia bundle (blue circle) showing decrease after PAO injection. The vertical line at time zero indicates the time of injection of PAO. Data were normalized to the average trajectory amplitude recorded before injection. Averaged data from 35 individual preparations  $\pm$  s.e.m. (E-G) Averaged change of the bundle motion at the base of outer hair cell stereocilia (blue bar), at their tip (red bar) and deflection (green bar) shown. Significant decrease in tip and base motion resulting in a change in the bundle deflection. Data were normalized to the base trajectory amplitude recorded before the injection. Mean data from 35 individual preparations  $\pm$  s.d. (H) An OHC bundle showing electrically evoked cell motility change color-coded displacement data superimposed before and after PAO injection. (I) The average electromotility amplitude increased non-significantly 30 nm after the PAO injection. Data from 28 individual preparations. The acoustic stimulus is a 220 Hz tone at 80 dB with current stimulus of 10  $\mu$ A. (J) No change in the stereocilia bundle morphology seen before and after PAO injection for FRAP experiment. (K) Normalized traces of the fluorescence intensity during fluorescence recovery in the bundle region of interest measuring the diffusion

time of the dye before and after injection averaged across 22 preparations. (L) Fitting the experimental data to single phase exponential fit model showed a faster recovery of the bundle fluorescence with reduced  $\tau_{1/2}$  after PAO injection on average for experiments in panel N. (M) Tuning curves for the cochlear microphonic potential before and after 1.0 mM PAO injection in an example preparation. The amplitude of the cochlear microphonic potential decreased by 320  $\mu$ V at its peak. (N) Normalized mean peak amplitude of the averaged time courses of the cochlear microphonic potential showing substantial irreversible decrease 10-15 minutes after PAO injection (n=33). The vertical line indicates the time of injection of PAO. (O) Comparison of cochlear microphonic potential amplitude before and after PAO injection which reduced significantly for experiments in panel n. Data were normalized to the data recorded before the injection. Data are the means  $\pm$  s.e.m or s.d. (E-G). \*\*\*\*P<0.0001; \*\*P<0.01; \*P<0.05; n.s., not significant; two-tailed paired t test.

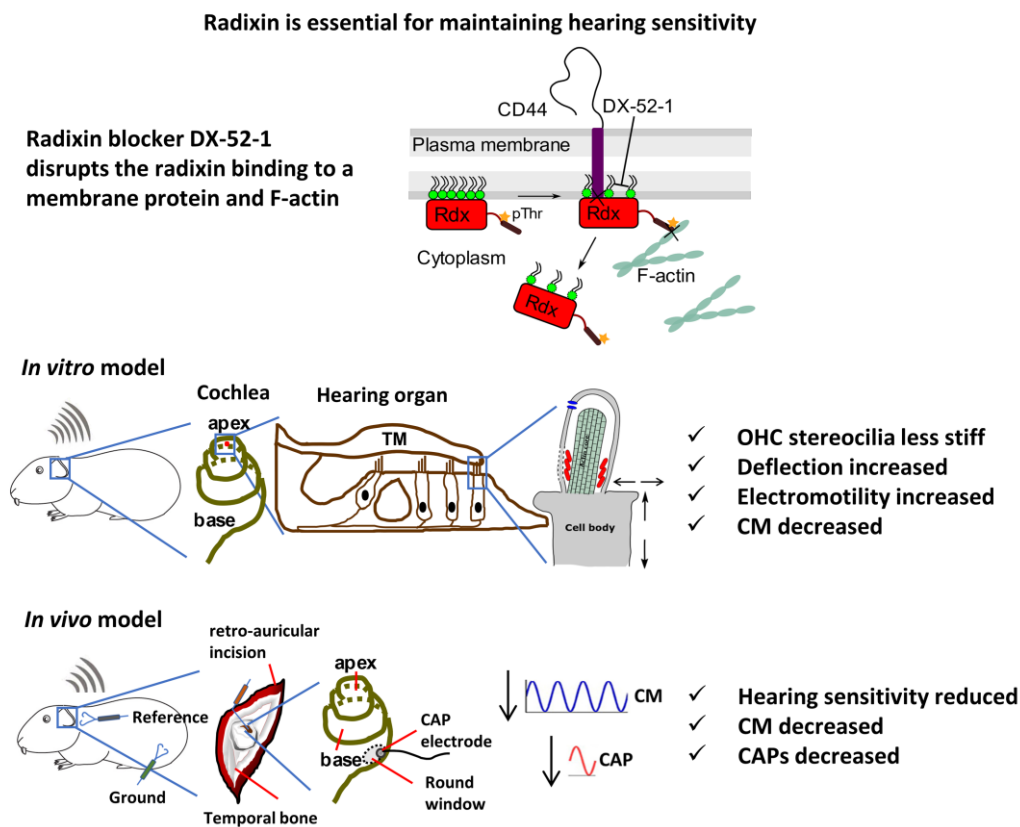

**Figure 6. Radixin is required for maintaining the mechanical stability of stereocilia and hearing sensitivity.**

Schematic diagram of outer hair cell stereocilia with radixin binding area. The top scheme represents the molecular interactions between radixin and F-actin cytoskeleton and the transmembrane protein CD44. In the hearing organ of animals where the radixin blocker DX-52-1 was not applied, the animals had normal hearing and stereocilia functions. Application of the blocker results in a disruption of the link between radixin and F-actin. The animal had reduced hearing sensitivity and large effects on the OHC stereocilia functions were evident.
